# 1 **Adaptor linked K63 di-Ubiquitin activates Nedd4/Rsp5 E3 ligase**

2 Lu Zhu<sup>1,2</sup>, Qing Zhang<sup>1,2</sup>, Ciro Cordeiro<sup>1,2</sup>, Sudeep Banjade<sup>1,2</sup>, Richa Sardana<sup>1,2</sup>, Yuxin Mao<sup>1,2</sup>, Scott D. Emr<sup>1,2</sup>

3

4 1 Weill Institute for Cell and Molecular Biology, Cornell University, Ithaca, NY.

5 2 Department of Molecular Biology and Genetics, Cornell University, Ithaca, NY.

6 Correspondence to Lu Zhu: [lz232@cornell.edu](mailto:lz232@cornell.edu); or Scott D. Emr: [sde26@cornell.edu](mailto:sde26@cornell.edu)

7 Key words: K63 di-ubiquitin, Nedd4/Rsp5, E3 ligase, adaptor, ubiquitination

8 Running title: The K63 di-Ubiquitination of Nedd4/Rsp5 adaptors

## 9 **Abstract**

10 Nedd4/Rsp5 family E3 ligases mediate numerous cellular processes, many of which require the  
11 E3 ligase to interact with PY-motif containing adaptor proteins. Several Arrestin-Related  
12 Trafficking adaptors(ARTs) of Rsp5 were self-ubiquitinated for activation, but the regulation  
13 mechanism remains elusive. Remarkably, we demonstrate that Art1, Art4, and Art5 undergo K63-  
14 linked di-ubiquitination by Rsp5. This modification enhances the PM recruitment of Rsp5 by Art1  
15 or Art5 upon substrate induction, required for cargo protein ubiquitination. In agreement with these  
16 observations, we find that di-ubiquitin strengthens the interaction between the Pombe orthologs of  
17 Rsp5 and Art1, Pub1 and Any1. Further, we discover that the HECT domain exosite protects the  
18 K63-linked di-ubiquitin on the adaptors from cleavage by the deubiquitination enzyme Ubp2.  
19 Strikingly, loss of this protection results in the loss of K63-linked di-ubiquitin from the adaptors  
20 and diverts the adaptors for K48-linked poly-ubiquitination and proteasome-mediated degradation.  
21 Together, our study uncovers a novel ubiquitination modification implemented by Rsp5 adaptor  
22 proteins, underscoring the regulatory mechanism of how adaptor proteins control the recruitment  
23 and activity of Rsp5 for the turnover of membrane proteins.

## 24 **Introduction**

25 The Nedd4/Rsp5 family E3 ligases are responsible for membrane protein ubiquitination, required  
26 for endocytosis and lysosome-dependent protein degradation. Tryptophan-tryptophan (WW)  
27 domains of Nedd4 family E3 ligases bind to substrate proteins via interaction with PY motifs  
28 containing a consensus sequence P/L-P-x-Y (Rotin & Kumar, 2009; Schild *et al*, 1996). Other  
29 substrates lack PY motifs and instead rely on interactions with adaptor proteins that recruit the  
30 Nedd4 E3 ligase to them, exemplified by a family of arrestin-related trafficking adaptors (ARTs)  
31 that bridge the association between substrates and Rsp5 for ubiquitination(Lin *et al*, 2008).  
32 Additionally, Rsp5 adaptors include a diverse group of transmembrane (TM) proteins to mediate  
33 degradation of membrane proteins localized at the PM, Golgi, endosome and vacuole membrane  
34 (Alvaro *et al*, 2014; Becuwe *et al*, 2012; Hatakeyama *et al*, 2010; Hettema *et al*, 2004; Hovsepian  
35 *et al*, 2018; Leon *et al*, 2008; Li *et al*, 2015; MacDonald *et al*, 2012; Nikko & Pelham, 2009;  
36 O'Donnell *et al*, 2013; Sardana *et al*, 2018; Zhu *et al*, 2020)

37

38 Many of the Nedd4/Rsp5 adaptor proteins undergo self-ubiquitination. The ART proteins Art1,  
39 Art4 and Art8 require specific ubiquitination by Rsp5 to reach full activity (Becuwe *et al.*, 2012;  
40 Hovsepian *et al*, 2017; Lin *et al.*, 2008). Ubiquitination of Nedd4 adaptor protein *Commissureless*  
41 is required to downregulate the Robo receptor at the cell surface of axons, essential for midline  
42 crossing (Ing *et al*, 2007; Myat *et al*, 2002). The N-lobe region of the Nedd4/Rsp5 family E3  
43 ligase HECT domain contains an exosite which binds ubiquitin and has been shown to orient the  
44 ubiquitin chain to promote conjugation of the next ubiquitin molecule of the growing polyubiquitin  
45 chain(Kim *et al*, 2011; Maspero *et al*, 2011). It was proposed that ubiquitinated Rsp5 adaptors are  
46 more active when locked onto Rsp5 but less active when unlocked by Ubp2 (MacDonald *et al*,

47 2020). However, the mechanism of how Nedd4/Rsp5 adaptor ubiquitination helps enhance E3  
48 ligase function remains unclear.

49

50 In this study, we decoded the activation mechanism of how adaptor protein ubiquitination  
51 enhances E3 ligase function and how this ubiquitination itself is regulated by the deubiquitination  
52 (DUB) enzyme Ubp2. Remarkably, we discovered that the Rsp5 adaptors Art1, Art4, and Art5 are  
53 conjugated with K63-linked di-Ub at specific ubiquitination sites. Ubiquitination of Art5 and Art1  
54 enhances Rsp5 recruitment to the plasma membrane thereby promoting substrate ubiquitination.  
55 Our analysis of the binding affinity of di-Ub or isolated PY motifs to Rsp5 targeted domains  
56 uncovered that K63-linked di-Ub conjugation to the adaptor protein Any1 sharply enhances its  
57 binding to E3 ligase Pub1. Strikingly, we found that deletion of *UBP2* rescues the deubiquitination  
58 of adaptor proteins Art5 and Art1 in the *rsp5*-exosite mutant. Our data reveals the interplay  
59 between Ubp2 and “Rsp5 exosite engagement” to modulate adaptor protein ubiquitination and  
60 catalyze the switch from K63-linked di-Ub to K48-linked ubiquitin chains. Taken together, these  
61 results serve as a portal for future studies of Nedd4/Rsp5 adaptor proteins in general.

62

## 63 **Results**

### 64 **Rsp5 adaptor protein Art5 undergoes K63-linked di-ubiquitination**

65 In yeast, 14  $\alpha$ -arrestin domain containing proteins have been identified: Art1-Art10(Lin *et al.*,  
66 2008; Nikko & Pelham, 2009), Bull1-Bul3 (Yashiroda *et al.*, 1996) and Spo23 (Aubry & Klein,  
67 2013). These proteins have clear arrestin sequence signatures and contain multiple PY motifs that  
68 specifically interact with the WW domains in Rsp5 (Baile *et al.*, 2019), and can recruit Rsp5 to  
69 specific intracellular locations. This interaction not only results in ubiquitination of cargo proteins,  
70 but also ubiquitination of ARTs themselves. In fact, several  $\alpha$ -arrestin domain containing proteins

71 have been shown to be ubiquitinated by Rsp5, including Bul1, Bul2, Art1, Art4, Art5, Art6 and  
72 Art8. Among these, Art5 contains an  $\alpha$ -arrestin domain and three C-terminal PY motifs (figure  
73 1A). It has been shown that Art5 is the only ART protein required for the inositol-induced  
74 endocytosis and degradation of the plasma membrane (PM) inositol transporter Itr1 (Nikko &  
75 Pelham, 2009).

76

77 We found that at steady state, endogenous Art5 migrates in two major bands by SDS-PAGE,  
78 corresponding to the ubiquitinated and non-ubiquitinated species (Lane 2 in the Fig. 1B). Mass  
79 spectrometry has previously indicated that ubiquitin is mainly conjugated on the K-364 residue of  
80 the Art5  $\alpha$ -arrestin domain (Swaney *et al*, 2013). We confirmed that Art5 ubiquitination was nearly  
81 completely ablated by mutating K364 (Fig. 1B, lane 3), and is completely abolished in the *art5* <sup>$\Delta$ PY</sup>  
82 mutant in which all three PY motifs were mutated (lane 4), demonstrating that Art5 ubiquitination  
83 depends on its interaction with Rsp5 via PY motifs. There is a minor portion (albeit weak) of PY  
84 motifs dependent Art5 higher molecular weight species (lane 2), probably due to other lysines.  
85 Strikingly, the molecular weight difference (~20KDa) between the non-ubiquitinated and  
86 ubiquitinated forms of Art5 appears to be more than one single ubiquitin (~9KDa), suggesting  
87 more than one ubiquitin molecule is conjugated to the Art5 protein. To test this hypothesis, we  
88 fused the C-terminus of *art5* <sup>$\Delta$ PY</sup> with 1, 2, 3 or 4 ubiquitin molecules to create *art5* <sup>$\Delta$ PY</sup>-1xUb,  
89 *art5* <sup>$\Delta$ PY</sup>-2xUb, *art5* <sup>$\Delta$ PY</sup>-3xUb and *art5* <sup>$\Delta$ PY</sup>-4xUb, respectively. Remarkably, the ubiquitinated  
90 Art5<sup>WT</sup> runs in line with *art5* <sup>$\Delta$ PY</sup>-2xUb, indicating that Art5 is di-ubiquitinated mainly at the K-  
91 364 residue (Lane 4, 5 and 6 of Fig. 1B).

92

93 We next asked what is the linkage in the di-ubiquitin that is conjugated to Art5. Rsp5 mainly  
94 catalyzed K63-linked ubiquitin chain synthesis *in vivo* and *in vitro* (Lauwers *et al*, 2009; Saeki *et*  
95 *al*, 2009). We therefore decided to examine whether the di-ubiquitin moiety on Art5 is K63-linked.  
96 We analyzed the migration of Art5<sup>WT</sup>, art5<sup>K364R</sup>, and art5<sup>ΔPY</sup> proteins in yeast strains expressing  
97 Ub-WT and Ub-K63R. Notably, as seen in Figure 1C, we found that the size of the di-ubiquitinated  
98 Art5 band (lane 2 and 3) is reduced to the mono-ubiquitinated band (lane 9 and 10), in line with  
99 art5<sup>ΔPY</sup>-1xUb. As expected, this mono-Ub was conjugated to K364 residue. We noticed the loss of  
100 Art5 protein in the Ub-K63R mutant in a K364 and PY motif dependent manner (lane 9, figure  
101 1c), which will be discussed later. In addition, the mono-ubiquitinated band of Art5 in the yeast  
102 Ub-K63R mutant is K364 residue dependent, confirming that the mono-ubiquitin is conjugated  
103 mainly at the K364 residue. These data are consistent with the alignment with art5<sup>ΔPY</sup>-2xUb? (Fig.  
104 1C), indicating that endogenous Art5 is di-ubiquitinated. Together, our result demonstrate that  
105 Art5 protein is di-Ubiquitinated at residue K364 in a K63 linkage by Rsp5.

106

107 Besides Art5, we next addressed if other ART proteins also undergo K63-linked di-ubiquitination.  
108 To test this idea, we employed the same approach to analyze another ART family member, Art1.  
109 Art1 was found to mediate downregulation of plasma membrane nutrient transporters such as Can1,  
110 Mup1, Fur4, and Lyp1. Art1 contains an N-terminal arrestin fold with PY motifs near its C-  
111 terminus (Fig. S1A), which bind to Rsp5's WW domains. The K486 residue is required for Art1  
112 ubiquitination (Lin *et al.*, 2008). As anticipated, the ubiquitinated form of Art1 shows the same  
113 mobility shift in comparison with art1<sup>ΔPY</sup>-2xUb (Fig. S1B). To test if Art1 is ubiquitinated in a  
114 K63 linkage, we expressed the Art1<sup>WT</sup>, art1<sup>K486R</sup> and art1<sup>ΔPY</sup> in a yeast strain expressing only Ub-

115 K63R. The ubiquitinated band of Art1 migrates with *art1*<sup>ΔPY</sup>-2xUb in the Ub-WT strain, while  
116 Art1 is mono-ubiquitinated at K486 in the yeast strain bearing Ub-K63R (Fig. S1C).

117

118 In addition to Art5 and Art1, another  $\alpha$ -arrestin domain containing protein, Art4, also interacts  
119 with Rsp5 via PY motifs and can be ubiquitinated at a cluster of lysines (K235, K245, K264 and  
120 K267) in the N-terminal arrestin domain (Becuwe et al., 2012), as shown in Figure S1E. To  
121 examine the Art4 ubiquitination status, we expressed the Art4<sup>WT</sup>, *art4*<sup>KKR</sup> and *art4*<sup>ΔPY</sup> proteins in  
122 the yeast strains expressing Ub-WT and Ub-K63R. Due to Art4 phosphorylation when cells were  
123 grown in lactate medium, Art4 protein lysates were treated with phosphatase after being shifted to  
124 glucose containing culture medium. The ubiquitinated form of Art4<sup>WT</sup> migrates with the *art4*<sup>ΔPY</sup>-  
125 2xUb (Fig. S1F). In contrast, Art4<sup>WT</sup> was only mono-ubiquitinated in Ub-K63R condition. Taken  
126 together, our results demonstrated that  $\alpha$ -arrestin domain containing adaptor proteins Art1, Art4  
127 and Art5 are di-ubiquitinated and the di-ubiquitin is K63 linked (Fig. 1D, S1D and S1G).

128

### 129 **Ubiquitination of Art5 is required for cargo protein Itr1 ubiquitination**

130 As shown in the figure 1B, Art5 ubiquitination depends on the interaction with Rsp5 and is  
131 abrogated in the Art5 K364R mutant. We therefore sought to investigate how Art5 ubiquitination  
132 affects efficient inositol-dependent endocytosis and protein degradation of Itr1. To determine  
133 whether Art5 ubiquitination is important for Art5 function, we expressed Art5<sup>WT</sup> and *art5*<sup>K364R</sup> in  
134 an *art5*Δ mutant bearing a chromosomal Itr1-GFP. Itr1-GFP degradation occurs after treatment  
135 with inositol in a dose-dependent manner. Thus, higher inositol concentrations applied for the same  
136 amount of time results in more Itr1-GFP degradation in the WT cells (Fig. 2A, lane 5-8; Fig. 2C)  
137 and protein sorting into the vacuole lumen (Fig. 2B, middle panels), and this endocytosis and

138 degradation is Art5 dependent(Fig.2A, lane 1-4; Fig. 2C) (Nikko and Pelham, 2009). Cells  
139 expressing *art5*<sup>K364R</sup> caused a severe decrease in the rate of Itr1-GFP degradation (Fig. 2A, lane 9-  
140 12; Fig. 2C) and protein endocytosis (Fig. 2B, right) at higher inositol concentrations compared  
141 with Art5-WT. Thus, Art5 ubiquitination is essential to promote efficient Itr1 endocytosis and  
142 protein degradation upon inositol-treatment.

143

144 We hypothesize that the Itr1 sorting defect in *art5*<sup>K364R</sup> is due to defective Itr1 ubiquitination. To  
145 test it, we expressed Itr1-GFP in a *doa4*Δ mutant bearing a Myc-Ub expression vector to stabilize  
146 ubiquitinated membrane proteins after multivesicular body sorting into the vacuole. After inositol  
147 treatment, Itr1-GFP was immunoprecipitated from cell lysates prepared from yeast expressing  
148 Art5<sup>WT</sup> and *art5*<sup>K364R</sup>. The ubiquitinated pool of Itr1-GFP can be detected in the Art5<sup>WT</sup> condition,  
149 whereas this ubiquitination was attenuated in *art5*<sup>K364R</sup> condition (Fig. 2D). We next asked if the  
150 ubiquitination defect of Itr1 is due to the loss of protein-protein interaction between *art5*<sup>K364R</sup> and  
151 Itr1. To test this, Itr1-GFP was immunoprecipitated from yeast strains expressing Art5<sup>WT</sup> or  
152 *art5*<sup>K364R</sup> (Fig. 2E). *art5*<sup>K364R</sup> can be co-immunoprecipitated by Itr1-GFP comparable to Art5<sup>WT</sup>,  
153 indicating that the decrease of Itr1 ubiquitination upon inositol stimulation is not due to the loss  
154 of interaction between adaptor protein Art5 and cargo protein Itr1.

155

156 The importance of ubiquitination of the ART proteins in cargo protein sorting is further supported  
157 by our previous findings that the *art1*<sup>K486R</sup> allele results in a canavanine hypersensitivity phenotype  
158 (Lin et al., 2008). Here, we set out to test the endocytosis and protein degradation of Mup1-GFP  
159 in Art1<sup>WT</sup> and *art1*<sup>K486R</sup> after treatment with increased methionine concentrations. Consistent with  
160 previous results, the *art1*<sup>K486R</sup> allele leads to a sorting defect of Mup1-GFP (Fig. S2A, S2B and



161 S2C). Similarly, we sought to test if the Mup1-GFP can bind to both Art1<sup>WT</sup> and *art1*<sup>K486R</sup>. To do  
162 so, we examined the protein interaction between Mup1 and Art1 using co-IP analysis. Indeed, we  
163 can observe the interaction between Mup1 and overexpressed Art1 (Fig. S2D). In agreement with  
164 previous finding that the acidic patch in the Mup1 N-terminal tail is required for binding with Art1  
165 (Guiney *et al*, 2016), we showed that the Q49R Mup1 mutant did not interact with Art1 (Fig. S2E).  
166 Further, both Art1<sup>WT</sup> and *art1*<sup>K486R</sup> can bind to Mup1, as evidenced by the Co-IP of *art1*<sup>K486R</sup> with  
167 Mup1 when Art1 ubiquitination is impaired (Fig. S2F). Thus, our results demonstrate that the  
168 sorting defect of Mup1-GFP in the presence of *art1*<sup>K486R</sup> is not due to the loss of protein interaction  
169 between the adaptor protein Art1 and cargo protein Mup1.

170

171 Since TORC1 kinase regulates the Art1-dependent ubiquitin-mediated cargo protein endocytosis  
172 by modulating Art1 phosphorylation via Npr1 kinase (MacGurn *et al*, 2011), we decided to test if  
173 the non-ubiquitinated pool of Art1 loses the Npr1 dependence for phosphorylation thereby  
174 affecting cargo protein sorting. First, we expressed Art1<sup>WT</sup> or *art1*<sup>K486R</sup> in WT and *npr1*Δ mutant  
175 strains. We observed that both the di-ubiquitinated Art1 or the non-ubiquitinated Art1 pools  
176 migrated slightly faster in the *npr1*Δ mutant, consistent with dephosphorylation (Fig. S2G). Next,  
177 we treated the cells with either rapamycin or cycloheximide to monitor the change in  
178 phosphorylation status for ubiquitinated or non-ubiquitinated Art1. As shown in the figure S2H,  
179 the activated Npr1 kinase triggered by rapamycin treatment leads to phosphorylation of both  
180 Art1<sup>WT</sup> and *art1*<sup>K486R</sup>; whereas the dephosphorylation of these two proteins is observed following  
181 cycloheximide treatment. The Npr1 kinase-dependent phosphorylation is therefore the intrinsic  
182 feature of Art1, regardless of the ubiquitination status of Art1.

183

184 Since ARTs ubiquitination enhances function, we next sought to test if C-terminal fusion with  
185 ubiquitin molecules could rescue the cargo sorting defect of *art1*<sup>K486R</sup> or *art1*<sup>ΔPY</sup>. Since toxic  
186 arginine analog canavanine is transported by PM transporter Can1 in yeast and Can1 endocytosis  
187 prevents subsequent cell death (Grenson *et al*, 1966), canavanine hypersensitivity occurs when  
188 Can1 cannot be endocytosed (such as in an *art1*Δ mutant), which provides a readout of Art1  
189 function. Thus, we examined the canavanine sensitivity of the *art1*Δ mutant expressing Art1<sup>WT</sup>,  
190 *art1*<sup>K486R</sup> or *art1*<sup>ΔPY</sup> fused with C-terminal 1x, 2x or 3xUb. The C-terminal fusions with ubiquitin  
191 molecules did not enhance the functionality of Art1<sup>WT</sup>, *art1*<sup>K486R</sup> or *art1*<sup>ΔPY</sup> (Fig. S2I, S2J). Besides  
192 Art1, we tested if Itr1-GFP sorting can be restored by *art5*<sup>K364R</sup> with C-terminal 1xUb or 2xUb and  
193 found the 1x or 2xUb fusions do not enhance the Itr1 sorting (Fig. 2F). Together, our data indicate  
194 that di-ubiquitin needs to be conjugated at specific residues for proper functionality.

195

### 196 **PM recruitment of Rsp5 is enhanced by Art5 and Art1 protein ubiquitination**

197 The *art5*<sup>K364R</sup> mutant partially blocks the ubiquitination and cargo sorting of Itr1 after inositol  
198 treatment (Figure 2A and 2D), but still interacts with Itr1. We therefore hypothesize that the  
199 defective ubiquitination of *art5*<sup>K364R</sup> may impair Rsp5 recruitment to the PM. To test this idea, we  
200 examined the localization of Art5-GFP in yeast cells before and after inositol treatment. As seen  
201 in figure 3A, the Art5<sup>WT</sup>-GFP localized at cytosol, nucleus and occasional cytosolic puncta (Sec7-  
202 negative, Figure 3A). Strikingly, the Art5<sup>WT</sup>-GFP is re-localized to PM puncta and patch structures  
203 after 1 hour of inositol (20μg/ml) treatment. This result is in line with our previous finding that  
204 Art5 is partially translocated to peripheral puncta after shift from minimal media to YPD (Lin *et*  
205 *al.*, 2008), probably because the inositol concentration in YPD is not high enough to drive  
206 significant Art5 re-localization and Itr1 endocytosis. In comparison to Art5<sup>WT</sup>, the *art5*<sup>K364R</sup>-GFP

207 and *art5*<sup>ΔPY</sup> mainly remain in the cytosol even after inositol treatment (Figure 3B-D). We conclude  
208 that ubiquitination of Art5 is important for protein re-localization to the PM upon inositol treatment.  
209 We next asked if Rsp5 can be re-localized to the PM in an Art5-dependent manner after adding  
210 inositol to the growth media. As expected, Rsp5 was observed to be recruited to PM patches after  
211 inositol treatment in WT cells. However, Rsp5 PM recruitment after inositol treatment was  
212 substantially reduced in cells expressing either *art5*<sup>K364R</sup> or *art5*<sup>ΔPY</sup> (Figure 3E and 3F).

213

214 In addition to Art5, we also examined the PM localization of Art1 upon methionine treatment. Our  
215 previous results showed that Art1 is localized to Golgi, PM and cytosol, whereas the *art1*<sup>K486R</sup>  
216 mutant is mainly localized to the cytosol (Baile *et al.*, 2019; Lin *et al.*, 2008). Art1 is recruited to  
217 the PM during cargo downregulation upon cycloheximide treatment or shift from synthetic  
218 medium to rich medium (Lin *et al.*, 2008). As seen in the figure S3A, Art1 is efficiently recruited  
219 to the PM in YPD or in methionine media. In contrast to Art1<sup>WT</sup>, the recruitment of *art1*<sup>K486R</sup> to  
220 the PM is largely attenuated and no PM recruitment is seen with *art1*<sup>ΔPY</sup> (Figure S3B, S3C). We  
221 next tested whether Art1 facilitates PM recruitment of Rsp5. As expected, methionine treatment  
222 induces Rsp5 PM recruitment in cells expressing WT Art1, but this recruitment is much reduced  
223 in cells expressing *art1*<sup>K486R</sup> (Figure S3E, S3F). Taken together, our results support the model that  
224 specific ubiquitination of adaptor proteins is required for proper recruitment of Rsp5 to target  
225 membranes and subsequent ubiquitin-mediated endocytosis of cargo proteins.

226

### 227 **Substrate dependent PM recruitment of adaptor protein Art5 and Art1**

228 Next, we sought to examine if cargo proteins are required for adaptor protein recruitment to their  
229 functional locations. To do so, we examined the Art5-GFP PM recruitment in *ITR1-WT* and *itr1*Δ

230 mutants upon inositol treatment for 1 hour. Strikingly, we found that the PM recruitment of Art5-  
231 GFP is abolished in the *itr1* $\Delta$  mutant (Figure 3G, 3H). Similarly, we observed that the PM  
232 recruitment of Art1 is attenuated in the *mup1* $\Delta$  mutant with methionine induction for 1 hour (figure  
233 S3G and S3H). We further tested whether Art1 can be recruited to the PM in cells expressing  
234 *mup1*-Q49R mutant upon methionine treatment. Previous data showed that Mup1 mutant Q49R  
235 is unable to be endocytosed with methionine treatment (Guiney *et al.*, 2016) and the *mup1*-Q49R  
236 mutation abolishes the protein-protein interaction between Mup1 and Art1 (Figure S2E). We  
237 expected that PM recruitment of Art1 will be impaired in this mutant due to the loss of the  
238 interaction between Art1 and Mup1-Q49R. Indeed, PM recruitment of Art1 is abrogated in the  
239 *mup1*-Q49R condition (Figure S3G and S3H), suggesting that the Mup1-Art1 interaction is  
240 required for methionine-induced Art1 PM re-localization. Collectively, our data demonstrate that  
241 the substrate proteins (Itr1 and Mup1) are required for adaptor protein (Art5 and Art1) recruitment  
242 to target membranes (Fig. 3I).

243

#### 244 **K63-linked di-ubiquitination enhances the interaction between adaptor proteins and Rsp5**

245 We found that the Rsp5 adaptor proteins (Art5, Art1, and Art4) undergo K63-linked di-  
246 ubiquitination and this modification is required for efficient recruitment of Rsp5 to target  
247 membranes and cargo protein degradation. We hypothesized that adaptor di-ubiquitination  
248 enhances protein-protein interactions between di-ubiquitinated adaptors and Rsp5 and thus  
249 promotes the recruitment of the E3 ligase. To test this hypothesis, we set out to examine the binding  
250 between mono-Ub or K63-linked di-Ub and the HECT domain of Rsp5, as well as the binding  
251 between PY motifs and WW domains. To do so, we first generated K63-linked ubiquitin chains  
252 using K63-chain specific E2 enzymes Mms2/Ubc13 (Hofmann & Pickart, 1999; Sato *et al.*, 2008;

253 Spence *et al.*, 1995). Then, we performed a binding assay between glutathione-*S*-transferase (GST)  
254 fusion proteins to Rsp5 HECT domain or GST only and the K63-linked ubiquitin chains. The  
255 mono-Ub and K63-linked di-ubiquitin chains bind to GST-HECT domain (lane 7), but not to GST  
256 (Figure 4A). The binding between mono-Ub and HECT domain depends on the exosite/ubiquitin  
257 interface (Y516 and F618) (French *et al.*, 2009; Kim *et al.*, 2011); we found that the binding  
258 between K63-linked di-Ub and HECT domain is disrupted by the exosite mutants Y516A, F618A,  
259 or the Y516A/F618A double mutant (lane 8, 9 and 10 of Figure 4A), suggesting that the K63-  
260 linked di-Ub also interacts with the HECT domain via the exosite.

261

262 Each Need4 family E3 ligase contains a HECT domain. It was shown that HECT domains of  
263 various Nedd4 family HECT E3 ligases (Maspero *et al.*, 2011), as well as the Rsp5 HECT domain  
264 (Kim *et al.*, 2011), are able to interact with mono-Ubiquitin. Since we have shown that adaptor  
265 proteins are di-ubiquitinated in a K63-linkage, we next decided to examine the interaction between  
266 HECT domains and mono-Ub and K63-linked di-Ub. The dissociation constant (K<sub>d</sub>) for the  
267 interaction between HECT and mono-ubiquitin was quantified by isothermal titration calorimetry  
268 (ITC) assay to be approximately 201 μM (Figure 4B). We also employed the Rsp5 HECT exosite  
269 mutant (F618A) as a negative control. In agreement with the *in-vitro* GST-binding assay result in  
270 figure 4A, no binding was detected between mono-ubiquitin and HECT domain mutant (F618A,  
271 shown in the figure 4B). Ubiquitin is often recognized through a hydrophobic surface containing  
272 Ile44, which is bound by most Ubiquitin Binding Domains (UBDs) (Dikic *et al.*, 2009; Shih *et al.*,  
273 2000; Sloper-Mould *et al.*, 2001). We therefore included the ubiquitin binding mutant (I44A)  
274 serving as a negative control here. As expected, the I44A mutation of ubiquitin abolishes the  
275 binding between mono-ubiquitin and the HECT domain (Figure 4B). Our results suggest that the

276 HECT domain exosite and the I44-containing ubiquitin hydrophobic surface are required to bridge  
277 the protein-protein interaction between the HECT domain and ubiquitin. In contrast to the mono-  
278 ubiquitin results, K63-linked di-Ub enhances the binding affinity  $K_d=33\mu\text{M}$ , nearly 6-fold relative  
279 to the mono-Ub (Figure 4C). In line with the *in-vitro* GST binding result, we examined the binding  
280 between K63-linked di-Ub and the HECT domain mutant (F618A) by ITC and found that the  
281 protein-protein interaction is abolished. Head-to-tail M1-linked di-Ub was proposed to mimic the  
282 K63 ubiquitin linkage (Komander *et al*, 2009; Zhu *et al*, 2017). As expected, our ITC analysis  
283 showed that M1 linked di-Ub binds to HECT with  $K_d=36\mu\text{M}$ , comparable with the K63-linked di-  
284 Ub (Fig. 4D). In line with this result, our *in-vitro* binding assay showed that the binding between  
285 GST-2xUb and HECT domain is stronger than GST-Ub (Fig. 4E). In comparison, K48-linked di-  
286 Ub shows a much lower affinity than K63-di-Ub,  $K_d=145\mu\text{M}$  (Fig. 4F). Together, our results  
287 demonstrate that HECT domain specifically binds to linear form K63 di-Ub and the exosite site is  
288 required for ubiquitin binding.

289

290 We next wondered if both the proximal and distal end ubiquitin of the K63-linked di-Ub, or just  
291 the distal end Ub, contribute the binding to the HECT domain. Since Ile44 of ubiquitin is essential  
292 for binding of ubiquitin to HECT domain (Fig.4B), we fused a distal end Ub (I44A) mutant to a  
293 proximal Ub (WT) and generated the distal end I44A mutant of K63 di-Ub (Ub<sup>I44A</sup>-Ub<sup>WT</sup>). The  
294 Ile44 residue of the proximal end ubiquitin is essential for ubiquitin binding by Ubc13/Mms2 and  
295 critical for K63-linked di-Ub catalysis, the Ile44 mutant of the proximal end ubiquitin of the K63  
296 di-Ub cannot be made (Tsui *et al*, 2005). We found that the K63-linked Ub<sup>I44A</sup>-Ub<sup>WT</sup> binds to  
297 HECT with an  $K_d=120\mu\text{M}$ , lower binding affinity than the K63 di-Ub (Fig. 4G). Thus, our result

298 suggests that both distal and proximal ubiquitins contribute to the HECT domain binding, probably  
299 cooperatively.

300

301 We next sought to determine if K63-linked di-Ub enhances the binding between adaptor and  
302 HECT type E3 ligase. In spite of the fact that KR mutants of Art5 and Art1 lead to attenuated  
303 Rsp5 PM recruitment and cargo proteins (Itr1 and Mup1), we still observed the interaction between  
304 Art1-K486R or Art5-K364R with Rsp5 using Co-IP (Fig. 4H, 4I), probably due to the interaction  
305 between the PY motifs and WW domains. Indeed, as shown in the figure (Fig. 4J, 4K), Art1 and  
306 Art5 PY motif containing peptides interact with purified WW domains from Rsp5 ( $K_d= 3.6\mu\text{M}$   
307 for Art1 PY motifs and  $K_d=3.1\mu\text{M}$  for Art5 PY motifs), but not with PY motif mutants. Since the  
308 sole interaction between PY motifs and WW domains does not suffice the full activation of Rsp5  
309 function (Fig. 2A and S2A), the interaction between di-Ub and HECT may enhance the binding  
310 affinity between Need4/Rsp5 E3 ligases and their adaptors. We next sought to test the binding  
311 between full length adaptors and Rsp5. We found that we could not express Art1 or Art5 at high  
312 levels in *E. coli*, then tried to express the Art1 orthologue from *S. pombe*, Any1, in *E.coli*. We  
313 found the *S. pombe* Rsp5 ortholog Pub1 interacts with Any1 with a binding affinity  $K_d\sim 2.1\mu\text{M}$   
314 (Fig. 4L), in a similar range as the binding affinity between PY motifs and WW domains shown  
315 earlier (Fig. 4J, 4K). Remarkably, Any1 conjugated with K63 di-Ub enhances the binding with  
316 Pub1 over 10-fold in comparison with non-conjugated Any1 (Figure 4M), suggesting that di-Ub  
317 conjugation onto Any1 probably leads to a structural conformation change of Any1 and therefore  
318 enhances the binding with Pub1. This result is in agreement with our previous result that di-  
319 ubiquitination of Art5 and Art1 are required for efficient Rsp5 recruitment to the plasma membrane  
320 and for cargo protein sorting. Taken together, the di-ubiquitination of adaptor proteins enhances

321 the binding affinity with the E3 ligase, leading to E3 ligase recruitment and cargo protein  
322 ubiquitination and sorting.

323

### 324 **Deubiquitination of K63 di-Ub of adaptor protein Art5 by Ubp2**

325 Given that the exosite of Rsp5 is essential for binding with the di-Ub on adaptor proteins, we next  
326 examined the ubiquitination status for the adaptor proteins Art1 and Art5. The di-ubiquitinated  
327 form of Art5 is diminished in the *rsp5*-F618A mutant (Fig. 5A, lane 2). Similarly, the di-  
328 ubiquitinated pool of Art1 is substantially attenuated in either the Y516A or F618A exosite mutant  
329 (Fig. S4A). Maspero and coworkers reported that exosite mutants do not alter the binding affinity  
330 between E3 and E2 enzymes, the transthiolation process from E2 to E3, or the self-ubiquitination  
331 activity of Nedd4 (Maspero *et al.*, 2011). We therefore speculated that a deubiquitination enzyme  
332 (DUB) is involved in the trimming process of the K63-linked di-Ub. To test this hypothesis, we  
333 performed a multicopy gene suppression screen with all budding yeast DUBs. As shown in Figure  
334 S4B, overexpressing Ubp2 by a *TDH3* promoter leads to a reduction of the di-ubiquitinated portion  
335 of Art1. Further, we overexpressed the catalytic dead mutant C745V of Ubp2 and found that the  
336 deubiquitination of Art1 is restored (Fig. S4C). This result infers that Ubp2 may function as a DUB  
337 to trim the di-ubiquitinated form of Rsp5 adaptor proteins.

338

339 To investigate the role of Ubp2 in the modification of Rsp5 adaptor proteins, we examined the  
340 adaptor protein Art5 in a double mutant of *rsp5*-exosite (F618A) and *ubp2* $\Delta$ . Strikingly, the di-  
341 ubiquitinated Art5 and Art1 are nearly fully restored in the *rsp5*-F618A/*ubp2* $\Delta$  strain (Fig. 5A, lane  
342 4) and (Fig. S4D, lane 4), indicating that Ubp2 trims the di-ubiquitin on adaptors Art5 and Art1  
343 when they are disengaged from the Rsp5 exosite. To test if Ubp2 is playing a catalytic or structural



344 role in this process, we complemented the *rsp5-F618A/ubp2Δ* with either a wild-type or a catalytic  
345 mutant *ubp2-C745V*. We found that the Ubp2-WT (Fig. S4E lane 2) fully reverses the rescue of  
346 Art1 trimming seen in the lane 1, whereas the *ubp2-C745V* does not (Fig. S4E lane 3). Together,  
347 these results suggest that the exosite can protect the di-ubiquitin moiety on adaptors from the  
348 cleavage by Ubp2.

349

350 We next wondered if the loss of Art5 (Fig. 5A, lane 2) is mediated by proteasome function. To  
351 answer this question, we treated the *rsp5-F618A* mutant with proteasome inhibitor MG132. We  
352 found that the full length Art5 protein is restored 2.8 fold with temporary inhibition of proteasome  
353 function (Fig. 5B), suggesting that Art5 probably undergoes K48-linked polyubiquitination  
354 because K48-linked ubiquitin chains are preferred by the proteasome. As seen in figure 5B,  
355 either the PY motif or the K364R mutant rescues the loss of Art5, indicating that Rsp5 is the E3  
356 ligase responsible for Art5 degradation and the same site K364 is used for this ubiquitination  
357 process. To directly determine the involvement of K63 versus K48 linkage in the Art5 degradation,  
358 we examined the effect of overexpressing myc-ubiquitin with wild-type, K63R and K48R  
359 mutations on Art5 ubiquitination. We found that expressing myc-ubiquitin K63R does not affect  
360 Art5 hyperubiquitination in the *rsp5-exosite* mutant background, whereas the K48R ubiquitin  
361 mutant substantially reduced Art5 ubiquitination (Fig. 5C). This result suggests that the Art5  
362 ubiquitination in the *rsp5-exosite* mutant is mediated by a K48-linked polyubiquitin chain.

363

364 We then sought to uncover the mechanism by which the Art5 degradation is triggered. We  
365 observed that Art5 protein is also degraded in the *Ub-K63R* mutant (Fig. 1C). We wondered if  
366 *ubp2Δ* can rescue Art5 degradation in the *Ub-K63R* mutant. To test this, we deleted Ubp2 in the

367 *Ub*-K63R mutant and found that *ubp2* $\Delta$  does not reverse the loss of Art5 protein (Fig. 5D). Our  
368 results suggest that the loss of K63-di-Ub on Art5, instead of Ubp2, in either the *Ub*-K63R mutant  
369 or *rsp5*-exosite mutant, leads to Art5 degradation. Remarkably, in these two conditions, the Art5  
370 degradation can be rescued in *art5*-K364R and *art5*- $\Delta$ PY mutant (Fig. 5B and 5D). These data  
371 suggest that Rsp5 can mediate both K63 and K48-linked ubiquitination and the K364 residue of  
372 Art5 can be conjugated with both K63-linked di-Ub and K48-linked polyubiquitin chain.  
373 Collectively, our results support a working model that the K63-linked di-Ub on Art5 is fully  
374 engaged into the Rsp5 exosite so that Ubp2 cannot cleave it efficiently, whereas the K63-linked  
375 di-Ub is disengaged in an *rsp5*-exosite mutant therefore exposed to Ubp2 for cleavage. Upon the  
376 cleavage of K63-linked di-Ub, a K48-linked polyubiquitin chain is conjugated at the same residue  
377 Art5-K364 thereby leading to the proteasome-dependent degradation of Art5 (Fig. 5E-5H).

378

379 Since PM recruitment of Rsp5 is enhanced by Art5 or Art1 protein ubiquitination (Fig. 3E, S3E)  
380 and Ubp2 can deubiquitinate these adaptor proteins (Fig. 5A and S4D), we therefore asked if the  
381 adaptor ubiquitination process is reversible and Ubp2 is involved in this process or not. To monitor  
382 the pre-existing adaptor proteins, we decided to employ the *tet*-Off system to fix the pool of adaptor  
383 proteins by treating the cells with doxycycline. As seen in the figure S4F and S4G, pre-existing  
384 Art5 or Art1 undergoes ubiquitination upon inositol or methionine treatment for 1 hour in both  
385 WT and *ubp2* $\Delta$  conditions, whereas the adaptor proteins shifted back to less ubiquitinated status  
386 after removing the stimulation in the WT condition, but not in the *ubp2* $\Delta$  mutant. Together, our  
387 data demonstrate a model for adaptor protein recycling mediated by Ubp2 (Fig. S4H). First,  
388 stimulation enhances adaptor ubiquitination. Second, the ubiquitinated pool of adaptor proteins  
389 can be de-ubiquitinated by Ubp2 when stimulation is terminated.

390

## 391 **Discussion**

392 In this study, we identified the first K63-linked di-Ub modification that modulates the function of  
393 Rsp5 and adaptor proteins. Our data demonstrates that two biological functions are implicated with  
394 this K63-linked di-Ub modification. First, K63-linked di-Ub activates Rsp5 function. K63-linked  
395 di-Ub enables the full engagement of adaptors onto the Rsp5 exosite and sharply enhances the  
396 binding affinity with Rsp5, which facilitates Rsp5 recruitment and accelerates substrate protein  
397 ubiquitination. Second, K63-linked di-Ub prevents the adaptors from being conjugated with K48-  
398 linked polyubiquitin. K63-linked di-Ub on adaptors engaged with the Rsp5 exosite are not  
399 accessible to Ubp2. Once released from Rsp5 exosite, the exposed K63-linked di-Ub is subjected  
400 to cleavage by Ubp2 and K48-linked polyubiquitin subsequently can be conjugated onto the  
401 adaptor protein, which signals proteasome-dependent protein degradation. Further, we monitored  
402 the ubiquitination status of adaptor proteins Art1 and Art5. Using *tet*-Off system, we have shown  
403 that adaptor proteins undergo ubiquitination upon stimulation and Ubp2 is required for  
404 deubiquitination of adaptor proteins once the stimulation is removed. As hypothesized by our  
405 earlier review (MacGurn *et al*, 2012), our current data supports the model that ubiquitinated  
406 adaptor proteins were deubiquitinated by Ubp2 once released from Rsp5 exosite so that the adaptor  
407 proteins can be recycled for the next round of ubiquitination event.

408

## 409 **K63-linked di-Ub is engaged into Rsp5 E3 ligase for activation**

410 While we showed that Rsp5 adaptors Art1, Art4 and Art5 undergo K63-linked di-Ub modification,  
411 we also demonstrate that this conjugation sharply enhances the binding with the E3 ligase and  
412 activates the E3 ligase function for substrate ubiquitination (Fig. 2D). We reason that the

413 interaction between the di-Ub chain and the HECT domain locks the E3 ligase and adaptor into an  
414 active/functional conformation. For adaptor-independent ubiquitination, the Nedd4/Rsp5 ligase  
415 exosite is also required for efficient ubiquitin conjugation, demonstrating that the “Ub-exosite  
416 binding” is required to localize and orient the distal end ubiquitin chain to promote conjugation  
417 (Kim *et al.*, 2011; Maspero *et al.*, 2011). In terms of the Rsp5 adaptor- mediated function, we  
418 propose that the binding between “di-Ub and exosite” not only enhances the binding affinity  
419 between the E3 ligase and adaptor (Fig. 4L-4M), but also leads to more productive Rsp5  
420 recruitment to properly orient and present the substrate for ubiquitination at target membranes (Fig.  
421 3B).

422

423 While we presented the evidence of E3 ligase activation by ubiquitinated adaptors, we also showed  
424 that K63 di-Ub generates a 6-fold tighter binding to the HECT domain than mono-Ub. We reason  
425 that the K63 di-Ub provides alternative options to bind a single site, but also fits with a model in  
426 which there are multiple ubiquitin binding sites. It was found that three N-lobe mutations (Y516A,  
427 F618A, and V621A/V622A) completely abolished ubiquitin binding and three extra mutations  
428 (N513A, Y521A, and R651A) caused a reduction in binding (French *et al.*, 2009). Kim and  
429 coworkers found that the L8-I44-V70 hydrophobic patch of mono-Ub sits on Rsp5 in three legs,  
430 like a tripod (Kim *et al.*, 2011). Likewise, two separated UIMs in Rap80 bind to extended K63-  
431 linked ubiquitin chain favorably (Sato *et al.*, 2009; Sims & Cohen, 2009). Indeed, we have shown  
432 the results that K63-linked di-Ub with a mutation (I44A) at the distal end ubiquitin leads to lower  
433 binding with Rsp5 (Figure 4G). We propose that multiple ubiquitin binding sites are probably  
434 present at the Rsp5 exosite to accommodate the two hydrophobic patches of the distal and proximal  
435 ubiquitins, which needs be addressed in the future by structural analysis.

436

### 437 **The linkage specificity and length control for the K63-linked di-Ub**

438 We have been intrigued by the question of how the K63 linkage of di-Ub was achieved and  
439 preferred, instead of K48. It is known that yeast Rsp5 and human Nedd4 mainly assemble K63-  
440 linked ubiquitin chains (Kim & Huibregtse, 2009; Maspero *et al.*, 2011). The K48-linked di-Ub  
441 binds the HECT domain, but not as tight as K63-linked di-Ub (Fig. 4F). Interestingly, both the  
442 M1-linked and K63-linked di-Ubiquitins adopt an equivalent open conformation (Komander *et al.*,  
443 2009) and exhibit similar binding affinity to the HECT domain (Fig. 4D), indicating that the HECT  
444 domain exosite has a strong preference for the linear and extended form of di-Ub. In contrast, the  
445 K48-linked polyubiquitin chain adopts a significantly distinct and compact structure (Eddins *et al.*,  
446 2007), which may not be favorable for the HECT domain exosite.

447

448 Why is the K63-linked di-Ub chain limited to a dimer? On the one hand, this probably correlates  
449 with the physiological reversible function of adaptors. The K63-linked 3x or longer ubiquitin  
450 chains likely generate stronger binding with the HECT domain than di-Ub (Fig. 4E). We reason  
451 that the di-Ub binds well with the HECT domain, but still can be disengaged from the HECT  
452 domain under physiological conditions so that Rsp5 can be disassociated and recycled. On the  
453 other hand, the K63-linked di-Ub is probably just enough to be masked by the HECT domain  
454 exosite cavity whereas longer chains will be trimmed by Ubp2. Future structural studies could  
455 address the accessible region for the di-Ub isopeptide bond cleavage by Ubp2 when di-Ub is  
456 engaged into the HECT domain. Further, a K63-linked polyubiquitin chain also can serve as a  
457 targeting signal for proteasomal degradation (Ohtake *et al.*, 2018; Saeki *et al.*, 2009). We noticed  
458 that hyperubiquitinated forms (>2xUb) of ART proteins are not stables since the linear form of

459 3xUb leads to adaptor protein degradation (Lanes #7 of the figures 1C, S2C and S2F). Indeed,  
460 K63-linked polyubiquitin on Rsp5 adaptor proteins contributes to proteasomal degradation of the  
461 adaptors (Ho *et al*, 2017).

462

463

#### 464 **Ubp2 mediates the recycling of Rsp5 E3 ligases from adaptors after ubiquitination**

465 McDonald and coworkers proposed that several Rsp5 adaptors compete for Rsp5 and a Ubp2  
466 deficiency increased both the adaptor activity and the ability to compete for Rsp5 (MacDonald *et*  
467 *al.*, 2020). Indeed, the PPxY motif containing Rsp5 adaptors share the E3 ligase Rsp5 and an  
468 adaptor should disassociate from Rsp5 to allow other adaptors to engage with Rsp5 to ubiquitinate  
469 different substrate proteins. In agreement with this working model, Nedd4-mediated  
470 downregulation of the sodium channel ENaC is impaired when Nedd4 is sequestered by  
471 overexpression of another Nedd4 E3 adaptor, Ndfip2 (Konstas *et al*, 2002).

472

473 Besides cleavage of K63 di-Ub in the *rsp5*-exosite mutant, Ubp2 allows the recycling of Rsp5  
474 from its adaptor proteins. Since K63 di-Ub greatly enhances the binding affinity between adaptors  
475 and E3 ligase (shown in figure 4), Ubp2 likely helps the Nedd4/Rsp5 E3 ligase to catalyze distinct  
476 ubiquitination events by cleaving the di-Ub off the adaptors and recycling Rsp5. The multitasking  
477 of Rsp5 via various adaptors leads us to hypothesize that activated Rsp5 can be released from  
478 engaged adaptor proteins. We showed that the adaptor proteins Art1 and Art5 undergo di-  
479 Ubiquitination upon environmental stimulation and Ubp2 is required to reverse this ubiquitination.  
480 Once the ubiquitination is done, the engaged K63 di-Ub is exposed for cleavage by Ubp2.

481 Thereafter, Ubp2 acts on ubiquitinated adaptor proteins to release the adaptor proteins and Rsp5.

482 The mechanism by which Ubp2 executes this reaction needs to be addressed in the future.

483

484 In summary, we propose that Rsp5 ubiquitinates adaptors to trigger their engagement with the

485 Rsp5 exosite, which enables the tight binding between adaptors and Rsp5 thereby activating Rsp5

486 function. Ubp2 acts as an antagonist for K63 di-Ub to modulate the interaction between K63-di-

487 Ub and the Rsp5 exosite in a reversible manner to maintain cellular homeostasis of Rsp5. Future

488 work needs to address the atomic structure of the ART family of adaptor proteins in complex with

489 Rsp5 in order to understand how di-Ub is attached to the adaptor and how the di-ubiquitinated

490 adaptors engage with the HECT E3 ligases, stabilizing an activated conformation of the E3 ligase.

## 491 **Material and Methods**

### 492 **Yeast strains, cloning, mutagenesis and cell growth conditions**

493 The *ART1*, *ART4*, *ART5*, *ITR1*, *MUP1* and *YUH1* genes were cloned from *Saccharomyces*  
494 *cerevisiae* yeast strain SEY6210. Pub1 (residue 287-767) and Any1 (residue 17-361) were PCR  
495 amplified from *Schizosaccharomyces pombe* yeast strain PR109 and subcloned into pET28a with  
496 an N-terminal 6xHis-SUMO tag. When necessary, the gene deletions and taggings were made  
497 using gene replacement technique with longtine-based PCR cassettes (Longtine et al., 1998). All  
498 yeast strains and plasmids are described in Tables S1 and S2. For fluorescent microscopy  
499 experiments, cells were grown overnight to mid-log phase (OD<sub>600</sub>~0.5) in synthetic media at 30°C.  
500 For inositol or methionine stimulation experiments, cells were grown in synthetic media to log  
501 phase (OD<sub>600</sub>~0.8) then treated with exogenous inositol and methionine at different  
502 concentrations. Ub-WT, Ub-K63R, Ub-K48R, Ub-D77, Mms2 and Ubc13 were PCR amplified  
503 from yeast strain SEY6210 genomic DNA and cloned into pET21a, pET28a-6xHIS and pGEX6p-  
504 1 respectively. 1x, 2x, and 3x and 4x Ub head-to-tail fusions of Art1, Art4, Art5 expression and  
505 pGEX6p-1 vectors were made by Gibson assembly. E1 enzyme expression vector pET21a-Uba1  
506 (human) and K48 ubiquitin linkage specific E2 enzyme E2-25K expression vector pGEX-6p-1-  
507 E2-25K are from our lab stock. YUH1 was subcloned into pGEX6p-1 expression vector with an  
508 N-terminal GST tag. PY motifs containing regions for Art1 (661-710) and Art5 (520-586) were  
509 PCR amplified and cloned into pGEX-6p-1 vectors. Rsp5 HECT domain (444-809) and WW1-  
510 HECT domain (224-809) were fused with N-terminal SUMO tag and cloned into pET28a vector.

511

### 512 **Protein Purification**



513 All pET21a, pET28a, pGEX6p-1 constructs were transformed into *Escherichia coli* strain Rosetta  
514 (DE3) cells. Single colonies were then cultured in Luria-Bertani (LB) medium containing either  
515 100µg/ml Ampicillin or 50 µg/ml kanamycin to a density between 0.6 and 0.8 OD600 at 37°C.  
516 Cultures were induced with 0.2 mM isopropyl-B-D-thiogalactopyranoside (IPTG) at 18°C for 16  
517 hours. *E.coli* cells were collected by centrifugation at 3,500 rpm for 15 min at 4°C. For non-tagged  
518 ubiquitin purification, cells were disrupted by sonication in the lysis buffer (50mM NH4Ac  
519 (pH4.5rt), 2mM DTT, 1mM EDTA, 1mM PMSF). For 6xHIS-SUMO tagged proteins, cells were  
520 sonicated in the lysis buffer (20 mM Tris (pH 7.5), 150 mM NaCl, 2mM DTT, 1mM EDTA, 1mM  
521 PMSF). For GST fusion proteins, cells were disrupted in the lysis buffer (200mM NaCl, 25mM  
522 Tris.HCl pH8rt, 2mM EDTA, 2mM DTT, 1mM PMSF).

523

524 The lysate for Ub (WT, K63R, K48R, I44A, D77 or D77/I44A) was adjusted to pH4.5 then spun  
525 down at 46,000xg for 45 min at 4°C. The supernatant was heated at 70°C for 5 min then spun down  
526 again with the same condition. The supernatant was loaded onto SP Sepharose Fast Flow resin  
527 pre-equilibrated with the same lysis buffer (pH4.5). The Ub was eluted with 50mM ammonium  
528 acetate (pH4.5 room temperature) buffer containing 2mM DTT using a linear gradient of 0-  
529 500mM NaCl. The eluted Ub mutants were fractionated by Superdex 200-exclusion column then  
530 dialyzed against size-exclusion buffer (20 mM Tris (pH 7.5), 150 mM NaCl, 2mM DTT). Each  
531 mutant was concentrated to 15mg/ml and stored at -80 °C.

532

533 For 6xHIS-SUMO-tagged (HECT, Pub1(287-767), Any1(17-361) and WW1-HECT) and GST-  
534 tagged proteins (Ubc13, E2-25K, Yuh1, PY motifs of Art1 or Art5 and M1 linked Ub-Ub), the  
535 sonicated lysates were centrifuged 46,000xg for 45 min at 4°C. The supernatant was bound with

536 TALON cobalt resin or Glutathione Sepharose 4 Fast Flow and the resins were digested by SUMO-  
537 specific Ulp1 or GST-specific PreScission proteases to release the proteins of interest. The eluted  
538 proteins were fractionated by Superdex 200 using size-exclusion buffer (20 mM Tris (pH 7.5), 150  
539 mM NaCl, 2mM DTT). Ubc13, E2-25K and Yuh1 were concentrated to 750 $\mu$ M with 20% glycerol  
540 and the other proteins were concentrated to 1mM and stored at -80°C.

541

542 For 6xHis-tagged Uba1 and Mms2 purification, the *E.coli* cells were sonicated in lysis buffer 20  
543 mM Tris (pH 7.5), 150 mM NaCl, 2mM DTT, cOmplete™ protease inhibitor). The cell lysate (per  
544 1 liter) was cleared by centrifugation at 46,000xg, 45min, 4°C. The supernatant was incubated with  
545 cobalt-chelate TALON resin for 30min before column wash with lysis buffer supplemented with  
546 25mM imidazole and the protein of interest was eluted with 300mM imidazole and dialyzed  
547 against 50mM Tris-HCl (pH7.6) containing 2mM DTT and 0.1mM EDTA. The protein is  
548 concentrated to 100 $\mu$ M with 20% of glycerol and stored at -80°C.

549

550 For GST-tagged protein (GST-1xUb, GST-2xUb and GST-3xUb) purification, the sonicated cell  
551 lysate was spun down at 46,000xg, 45min, 4°C. The supernatant per 1 liter of cells was incubate  
552 with 2ml of Glutathione Sepharose 4 Fast Flow resin and washed with 5 column volumes of wash  
553 buffer (20mM Tris pH8rt, 200mM NaCl, 1mM DTT). The GST-tagged proteins were eluted by 2  
554 column volumes of elution buffer (100mM Tris pH8.5, 20mM Glutathione) then dialyzed against  
555 size-exclusion buffer (20 mM Tris (pH 7.5), 150 mM NaCl, 2mM DTT). Each protein was  
556 concentrated to 30mg/ml and stored at -80oC.

557

558 For synthesis of K63 or K48 di-Ub proteins, 5xPBDM buffer was prepared: 250 mM Tris-HCl  
559 (50%, pH 8.0, or pH7.6), 25 mM MgCl<sub>2</sub>, 50 mM creatine phosphate (Sigma P7396), 3 U/mL of  
560 inorganic pyrophosphatase (Sigma I1891), and 3 U/mL of creatine phosphokinase (Sigma C3755).  
561 K63 linked di-Ub is synthesized by incubating purified human E1 (0.1 μM), yeast E2 (Ubc13 and  
562 Mms2, 8 μM of each), two ubiquitin mutants (K63R and D77, 5mg/ml of each), ATP (2.5mM),  
563 1 mM DTT and 1xPBDM buffer (pH7.6). For K48 linked di-Ub synthesis, purified human E1  
564 (0.1 μM), E2-25K (20 μM), two ubiquitin mutants (K48R and D77, 7.5mg/ml of each), ATP  
565 (2.5mM), 1 mM DTT and 1xPBDM buffer (pH8.0) were mixed. The reaction mixtures of either  
566 K63 or K48 di-Ub were incubated at 37°C for overnight then the reaction was chilled on ice for  
567 10min to stop the reaction. 0.2 volume of 2M ammonium acetate was added to the reaction to  
568 decrease the pH to less than 4.0. The mixture were loaded to SP Sepharose Fast Flow. The K63  
569 di-Ub or K48 di-Ub mixtures were loaded onto Superdex 75 size-exclusion column using gel  
570 filtration buffer (20mM Tris-HCl (pH7.5), 2mM DTT, 150mM NaCl) and the fractions of diUb  
571 were pooled and concentrated.

572

### 573 **Synthesis and Purification of Any1-diUb**

574 To remove the D77 of the proximal Ub and unlock the carboxyl-terminal Gly-Gly of K63diUb for  
575 further conjugation, purified K63 linked di-Ub (30mg/ml) is exchanged into hydrolysis buffer (50  
576 mM Tris-HCl pH 7.6, 1 mM EDTA, and 1mM DTT) and treated with purified Yuh1 (final  
577 concentration of 16 μg/ml) for 60minutes at 37°C. After cooling down the reaction at room  
578 temperature, 4mM DTT to the mixture is supplemented with DTT to 5mM (final concentration).  
579 The reaction mixture was then applied to a 5 ml Q column equilibrated with Q buffer (50 mM  
580 Tris-HCl pH 7.6, 1 mM EDTA, 5 mM DTT). After 2 bed volumes of wash, the unbound K63 di-

581 Ub (D77 removed) is collected and concentrated. Di-ubiquitination of Any1 was carried out by  
582 incubating purified Any1 proteins with human E1(0.1  $\mu$ M), human E2(UbcH5C, 0.3  $\mu$ M) and  
583 Pub1 (0.3  $\mu$ M), K63 diUb (D77 removed, 10  $\mu$ M), ATP (2.5mM), 1 mM DTT and 1xPBDM  
584 buffer (pH7.6) for 30min at room temperature. The reaction mixture was chilled on ice before  
585 loading onto Superdex 200 size-exclusion column using gel filtration buffer (150 mM NaCl, 20  
586 mM HEPES pH 7.5), and fractions of Any1-diUb were pooled and concentrated.

587

### 588 **GST pull down assay**

589 For pull-down experiments, 2  $\mu$ M of GST fusion proteins were immobilized onto 100 $\mu$ L of  
590 glutathione bead slurry in the 1ml of pull down buffer (50mM Na-HEPES pH7.5, 150mM NaCl,  
591 1mM EDTA, 1mM EGTA, 10% Glycerol, 1% Triton X-100). 500ng of Rsp5 HECT protein was  
592 added to the mixture and incubated at 4°C for 2 hours. After 4 washes with pull down buffer,  
593 specifically bound proteins were eluted by SDS-sample buffer and resolved on SDS-PAGE (11%)  
594 and detection was obtained by Coomassie-staining.

595

### 596 **Isothermal Titration Calorimetry assay**

597 Isothermal Titration Calorimetry (ITC) experiments were carried out on an Affinity-ITC  
598 calorimeter (TA instruments) at 25°C. Titration buffer contained 20 mM Tris-HCl (pH 7.5), 150  
599 mM NaCl, 1 mM DTT. For a typical experiment, each titration point was performed by injecting  
600 a 2  $\mu$ L aliquot of protein sample (50–1000  $\mu$ M) into the cell containing 300 $\mu$ L of another reactant  
601 (5–300  $\mu$ M) at a time interval of 200 s to ensure that the titration peak returned to the baseline.  
602 The titration data was analyzed with NanoAnalyze v3.12.0 (TA instruments) using an independent  
603 binding model.

604

### 605 **Fluorescence microscopy assay**

606 For fluorescence microscopy, cells expressing GFP, pHluorin or mCherry proteins were visualized  
607 using a DeltaVision Elite system (GE), equipped with a Photometrics CoolSnap HQ2/sCMOS  
608 Camera, a 100×objective, and a DeltaVision Elite Standard Filter Set ('FITC' for GFP/pHluorin  
609 fusion protein and 'mCherry' for mCherry fusion proteins). Image acquisition and deconvolution  
610 were performed using Softworx.

611

### 612 **Whole cell lysate extraction and western blotting**

613 Whole cell extracts were prepared by incubating 6 ODs of cells in 10% Trichloroacetic acid on ice  
614 for 1 hour. Extracts were fully resuspended with ice-cold acetone twice by sonication, then  
615 vacuum-dried. Dry pellets were mechanically lysed (3x 5min) with 100 µL glass beads and 100  
616 µL Urea-Cracking buffer (50 mM Tris.HCl pH 7.5, 8 M urea, 2% SDS, 1 mM EDTA). 100µl  
617 protein 2x sample buffer (150 mM Tris.HCl pH 6.8, 7 M urea, 10% SDS, 24% glycerol,  
618 bromophenol blue) supplemented with 10% 2-mercaptoethanol was added and samples were  
619 vortexed for 5 min. The protein samples were resolved on SDS-PAGE gels and then transferred to  
620 nitrocellulose blotting membranes (GE Healthcare Life Sciences).

621

622 The following antibodies and dilutions were used in this study: Rabbit polyclonal anti-G6PDH  
623 (1:30,000; SAB2100871; Sigma), Rabbit polyclonal anti-GFP (1:10,000; TP401; Torrypines),  
624 Mouse monoclonal anti-GFP (1:1,000; B-2, sc-9996; Santa Cruz), Mouse monoclonal anti-Myc  
625 (1:5,000, sc-40, Santa Cruz), IRDye® 800CW Goat anti-Mouse (1:10,000; 926-32210; LI-COR),  
626 IRDye® 800CW Goat anti-Rabbit (1:10,000; 926-32211; LI-COR), IRDye® 680LT Goat anti-

627 Rabbit (1:10,000; 926-68021; LI-COR) and IRDye® 680LT Goat anti-Mouse(1:10,000; 925-  
628 68070; LI-COR).

629

### 630 **Immunoprecipitation (IP) assay**

631 100 ODs of cells were collected and washed with water at 4°C. To examine the interaction between  
632 Art1 and Mup1-GFP, between Art5 and Itr1-GFP, or between ARTs protein and Rsp5. Yeast cells  
633 were washed with ice-cold water 3 times. The cells were lysed in 500 µl of IP buffer (20 mM  
634 Tris.HCl, pH 7.5, 0.5 mM EDTA, pH 8.0, 0.5 mM EGTA, 0.5 mM NaF, 150 mM NaCl, 10%  
635 glycerol, 1 mM PMSF, 10 mM *N*-ethylmaleimide (NEM), and cOmplete Protease Inhibitor). Cell  
636 extracts were prepared by glass-bead beating with 0.5-mm zirconia beads for five cycles of 30  
637 seconds vortexing with 1 minute breaks on ice. Membrane proteins were solubilized by adding  
638 500 µl of 1% Triton X-100 in IP buffer. The lysates were incubated at 4°C for 30 min with rotation  
639 then spun at 500xg for 5 min at 4°C. The supernatant was clarified by centrifugation at 16000xg  
640 for 10 min. To detect the interaction between ARTs and Mup1 or Itr1-GFP proteins, the cleared  
641 lysate was incubated with 50µl of GFP-nanotrap resin for 2 hours at 4°C. To examine the  
642 interaction between Rsp5 and ARTs, the cleared lysate was bound with 50µl of FLAG-M2 resin  
643 (Sigma, A2220) at 4°C for 2 hour. After incubation, the resin was washed 5 times with 0.1% Triton  
644 X-100 in IP buffer and the bound protein was eluted by 50 µl of 2x sample buffer.

645

646 To examine the ubiquitination of Itr1, Cells were grown to early log phase in synthetic media.  
647 Yeast strain (*doa4Δpep4Δart5Δ*, Itr1-GFP) cells co-expressing Myc-Ub expression vector (Zhu et  
648 al., 2017) and Art5<sup>WT</sup> or *art5*<sup>K364R</sup> were grown to mid-log phase in synthetic medium at 30°C. Cells  
649 were pretreated with 0.1µM CuCl<sub>2</sub> for 4 hours to induce the Myc-Ub expression prior to inositol

650 (20 $\mu$ g/ml) treatment. 100ODs of Cells were incubated with 10% TCA buffer and the extracts were  
651 washed with cold acetone. Dry pellets were mechanically lysed (3x 5min) with 100  $\mu$ L glass beads  
652 and 100  $\mu$ L Urea-Cracking buffer (50 mM Tris.HCl pH 7.5, 8 M urea, 2% SDS, 1 mM EDTA,  
653 200mM NEM). The cell lysates were mixed with 1ml of IP buffer (50 mM HEPES-KOH, pH 6.8,  
654 150 mM KOAc, 2mM MgOAc, 1mM CaCl<sub>2</sub>, 20mM NEM and 15% glycerol) with cOmplete™  
655 protease inhibitor (Sigma-Aldrich, St. Louis, MO). The Cell lysates were clarified by spinning at  
656 16,000xg for 10 min at 4°C. The resulting lysate was then incubated with 50  $\mu$ L GFP-nanotrap  
657 resin for 4 hours at 4°C. The resin was washed 5 times with 0.1% Triton X-100 in IP buffer. Bound  
658 protein was eluted by 50  $\mu$ l of 2x sample buffer. Whole cell lysate and the IP reaction was resolved  
659 on 10% SDS-PAGE gels and the blots were probed with both GFP and Myc antibodies.

660

#### 661 **Quantification of westernblot band intensity**

662 Westernblot in figures were quantified using Image-J software. The significance for protein  
663 densities were determined two-tail *t*-test,  $\alpha=0.05$  (Bonferroni correction),  $n=3$ . n.s. indicates not  
664 significant; \*,  $P < 0.05$ ; \*\*,  $P < 0.01$ ; \*\*\*,  $P < 0.001$ .

665

#### 666 **Quantification of microscopy images**

667 Images of GFP-Rsp5, Art5-GFP and Art1-mNG were taken by fluorescence microscopy. The  
668 fluorescence signal of the target proteins at PM were selected and measured by Image-J. The  
669 corrected total fluorescence of each selection = Selected density — (Selected area X Mean  
670 fluorescence of background readings). The ratio of GFP-Rsp5, Art5-GFP and Art1-mNG  
671 recruitment to PM or vacuole = (The corrected fluorescence density of the target proteins localized

672 at PM) / (The corrected fluorescence density). The ratios of GFP-Rsp5, Art5-GFP and Art1-mNG  
673 recruitment were measured from n=20 cells.

674

## 675 **Acknowledgements**

676 We are grateful to Dr. Jason A. MacGurn, Dr. Matthew G. Baile, and Dr. Sho Suzuki for critical  
677 reading of the manuscript. We also thank other members of the Emr lab for helpful discussions.

678 This work was supported by a Cornell University Research Grant (CU563704) to Scott D. Emr.

679



680 **Main figure titles**

681 Figure 1. Art5 undergoes K63-linked di-ubiquitination.

682 Figure 2. Ubiquitinated Art5 promotes cargo protein Itr1 ubiquitination.

683 Figure 3. The Art5 di-ubiquitination is required for Rsp5 membrane recruitment.

684 Figure 4. K63-linked di-ubiquitination enhances the interaction between adaptor proteins and Rsp5.

685 Figure 5. Deubiquitination of K63 di-Ub of adaptor protein Art5 by Ubp2

## 686 **Figure legends**

687 Figure 1. Art5 undergoes K63-linked di-ubiquitination. (A) Schematic representation of the  
688 domain architecture of Art5. (B) A di-ubiquitin is conjugated at K364 residue of Art5. Western  
689 blot analysis of Art5, *art5<sup>K364R</sup>*, *art5<sup>ΔPY</sup>*, *art5<sup>ΔPY</sup>-1xUb*, *art5<sup>ΔPY</sup>-2xUb*, *art5<sup>ΔPY</sup>-3xUb* and *art5<sup>ΔPY</sup>-*  
690 *4xUb* in the wild-type strain. (C) Art5 is di-ubiquitinated in a K63 linkage at the residue K364.  
691 Western blot analysis of Art5, *art5<sup>K364R</sup>*, *art5<sup>ΔPY</sup>* in both the *Ub-WT* and *Ub-K63R* mutant strains.  
692 (D) Model depicting the K63-linked di-ubiquitination of Art5 at the K364. The whole cell lysate  
693 protein samples were resolved on 7% SDS-PAGE gels and the blot was probed with FLAG and  
694 GAPDH antibodies.

695

696 Figure 2. Ubiquitinated Art5 promotes cargo protein Itr1 ubiquitination. (A) Immunoblot analysis  
697 of Itr1-GFP endocytosis induced with indicated concentration of inositol for 60 minutes. (B)  
698 Fluorescence microscopy of *art5Δ*, *Art5<sup>WT</sup>* or *art5<sup>K364R</sup>* cells expressing Itr1-GFP and vacuole  
699 membrane marker Vph1-mCherry with or without inducing endocytosis by treating with serial  
700 dilution of inositol. (C) Band densities of blots in (A) were quantified and expressed as the mean%  
701 Itr1-GFP degradation.  $p < 0.001$ ,  $n = 3$ . (D) *doa4Δpep4Δart5Δ* cells expressing Itr1-GFP and *Art5<sup>WT</sup>*  
702 or *art5<sup>K364R</sup>* were grown to mid-log phase in synthetic medium at 30°C. Cells were pretreated with  
703 0.1 μM CuCl<sub>2</sub> for 4 hours to induce the Myc-Ub expression before treated with 20 μg/ml of inositol.  
704 Cells were collected before and after 15 minutes of inositol treatment. Itr1-GFP was  
705 immunoprecipitated by GFP-Trap nanobody resin. Whole cell lysate and the IP reaction was  
706 resolved on 10% SDS-PAGE gels and the blots were probed with both GFP and Myc antibodies.  
707 The empty strain (*doa4Δpep4Δart5Δ*) is used as a negative control here. The whole cell lysate

708 proteins in the left gels represent the loading control and the co-immunoprecipitated protein  
709 samples were resolved in right gels. (E) IP of Itr1-GFP and blotting for Art5<sup>WT</sup> or *art5*<sup>K364R</sup>.

710

711 Figure 3. Rsp5 PM recruitment is enhanced by Art5 ubiquitination. (A-C) Fluorescence  
712 microscopy of Art5-GFP PY motif and K364R mutants in minimal media and after treating with  
713 inositol for 60min. (D) Quantification of PM localization of the indicated Art5 PY motif and  
714 K364R mutants. (E) Localization of GFP-Rsp5 in the presence of *ART5-WT*, PY motif or K364R  
715 mutants before and after inositol treatment for 60min. (F) Quantification of PM localization of  
716 Rsp5 in the experiment (E). (G-H) Fluorescence microscopy and quantification analysis of Art5-  
717 GFP in the WT and *itr1*Δ mutant condition, before and after inositol treatment. Scale bar = 2μm.

718

719 Figure 4. K63-linked di-ubiquitination enhances the interaction between adaptor proteins and Rsp5.  
720 (A) GST pull down assay between HECT-WT or F618A mutant and K63 linked Ubiquitin ladder.  
721 (B) Example ITC titration curves showing the binding of Mono-Ub-WT or I44A mutant to Rsp5  
722 HECT domain. (C) ITC-based measurements of the bindings between K63 di-Ub and Rsp5 HECT  
723 domain. (D) The representative ITC curves of showing the binding of M1 linked di-Ub and Rsp5  
724 HECT domain. (E) GST pull down assay between GST only, GST-1xUb, 2xUb or 3xUb and Rsp5  
725 HECT domains. (F) Measurement of affinity between K48 di-Ub and Rsp5 HECT domain by ITC.  
726 (G) ITC-based measurements showing that the K63 di-Ub with a distal end ubiquitin mutant (I44A)  
727 partially disrupts the binding affinity with Rsp5 HECT domain. (H-I) IP of Art1 and Art5, WT,  
728 KR and PY-motif mutants with Rsp5-HECT domain. (J-K) ITC analysis of Art1 or Art5 PY motifs  
729 containing domain and Rsp5 WW1-HECT domain. (L) Analysis of binding affinity between Any1

730 (Art1 orthologue in Pombe) and the Pub1 (Rsp5 orthologue in Pombe). (M) ITC results obtained  
731 by titration of Any1 conjugated with K63 di-Ub into a solution of Pub1.  
732  
733 Figure 5. Deubiquitination of Art5 di-Ub by Ubp2. (A) Immunoblot analysis of Art5-3HA in the  
734 indicated yeast strains: RSP5(WT), *rsp5*-F618A, *ubp2* $\Delta$  and *rsp5*-F618A/*ubp2* $\Delta$ . (B) Yeast strain  
735 *rsp5*-F618A expressing Art5-3HA, *art5*<sup>K364R</sup>-3HA and *art5* <sup>$\Delta$ PY</sup>-3HA were mock treated with  
736 DMSO and the cells bearing Art5-3HA were treated with MG132 (25 $\mu$ g/ml) for 60min. (C)  
737 Ubiquitin blot of *rsp5*-F618A yeast cells carrying Art5-3HA, as well as WT, K63R or K48R myc-  
738 ubiquitin expression vector. Cells were treated with MG132 (25 $\mu$ g/ml) for 60 min. Samples were  
739 immunoprecipitated using anti-HA antibody and analyzed by immunoblot. (D) Yeast mutants *Ub*-  
740 *K63R* and *Ub*-*K63R/ubp2* $\Delta$  expressing Art5-3HA, *art5*<sup>K364R</sup>-3HA and *art5* <sup>$\Delta$ PY</sup>-3HA. (E-H) models  
741 depicting that Ubp2 and Rsp5 modulates the K63 di-Ub and K48 polyubiquitination of Art5  
742 together: (E) K63 di-Ub of Art5 is protected from Ubp2 cleavage when engaged into exosite in  
743 RSP5/UBP2 condition. (F) Art5 remains engaged in exosite as K63 di-Ub in *ubp2* $\Delta$  mutant. (G)  
744 Art5 is not engaged in the exosite but kept as K63 di-Ub in *rsp5*-F618A/*ubp2* $\Delta$  condition. (H) K63  
745 di-Ub of Art5 is cleaved by Ubp2 and K48 polyubiquitin chain is instead conjugated at the K364  
746 of Art5 by Rsp5 before proteasomal degradation.

747 **Supplemental figure titles**

748 Figure S1. Art1 and Art4 undergoes K63-linked di-ubiquitination.

749 Figure S2. Ubiquitinated Art1 is required for efficient Mup1 ubiquitination.

750 Figure S3. The Art1 di-ubiquitination facilitates Rsp5 PM recruitment upon methionine treatment.

751 Figure S4. Deubiquitination of adaptor protein Art1 and Art5 by Ubp2

752 Figure S1. Art1 and Art4 undergoes K63-linked di-ubiquitination. (A) Scheme of the Art1 domains.  
753 (B) Immunoblot analysis of Art1, *art1<sup>K486R</sup>*, *art1<sup>ΔPY</sup>*, *art1<sup>ΔPY</sup>-1xUb*, *art1<sup>ΔPY</sup>-2xUb* and *art1<sup>ΔPY</sup>-*  
754 *3xUb* in the wild-type strain. (C) Immunoblot analysis of Art5, *art5<sup>K364R</sup>*, *art5<sup>ΔPY</sup>* in both the *Ub-*  
755 *WT* and *Ub-K63R* mutant strains. (D) Art1 is di-ubiquitinated in a K63 linkage at the residue K486.  
756 (E) Art4 domain architecture. (F) Immunoblot analysis of Art4, *art4<sup>K364R</sup>*, *art4<sup>ΔPY</sup>*, as well as in  
757 *art4<sup>ΔPY</sup>-1xUb*, *art4<sup>ΔPY</sup>-2xUb* and *art4<sup>ΔPY</sup>-3xUb* in both the *Ub-WT* and *Ub-K63R* mutant strains.  
758 (G) Art4 is di-ubiquitinated in a K63 linkage. The whole cell lysate protein samples were resolved  
759 on 7% SDS-PAGE gels and the blot was probed with FLAG and GAPDH antibodies.

760

761 Figure S2. Ubiquitinated Art1 is required for efficient Mup1 ubiquitination. (A) Mup1 degradation  
762 in the yeast mutant *art1Δ* expressing empty vector, *tetO7-Art1<sup>WT</sup>* or *tetO7-Art1<sup>K486R</sup>*. (B)  
763 Fluorescence microscopy of Mup1-GFP and Vph1-mCherry with or without methionine treatment.  
764 (C) Quantification of full length Mup1-GFP of the blots in (A). (D) IP of Mup1-GFP and Art1.  
765 (E) IP of Mup1-GFP and Art1<sup>WT</sup> and *art1<sup>Q49R</sup>*. (F) IP of Mup1-GFP and Art1<sup>WT</sup> and *art1<sup>K486</sup>*. (G)  
766 Western blot analysis of Art1<sup>WT</sup> and *art1<sup>K486</sup>* in both WT and *npr1Δ* mutant. (H) Western blot  
767 analysis of Art1<sup>WT</sup> and *art1<sup>K486</sup>* in WT cells with rapamycin (1μg/ml) or cycloheximide (50μg/ml)  
768 treatment for 1 hour. (I) Cell growth assay of *art1Δ* mutant expressing *art1<sup>ΔPY</sup>*, *art1<sup>K486R</sup>*, Art1-  
769 1xUb, Art1-2xUb, Art1-3xUb, *art1<sup>K486R</sup>-1xUb*, *art1<sup>K486R</sup>-2xUb* or *art1<sup>K486R</sup>-3xUb* grown at 30°C  
770 for 3 days on synthetic media containing canavanine. (J) Cell growth assay of *art1Δ* mutant  
771 expressing *art1<sup>ΔPY</sup>-1xUb*, *art1<sup>ΔPY</sup>-2xUb* or *art1<sup>ΔPY</sup>-3xUb* grown in synthetic media with  
772 canavanine at 30°C for 3 days.

773

774 Figure S3. The Art1 di-ubiquitination facilitates Rsp5 PM recruitment upon methionine treatment.  
775 (A-C) Fluorescence microscopy of Art1-mNeonGreen (mNG) WT, K486R and PY motif mutants  
776 treated with methionine or shifted from minimal media to rich media for 1hr. (D) Quantification  
777 of Art1 recruited to PM (%) in the experiment of (A-C), (E) Localization of GFP-Rsp5 in the  
778 presence of Art1<sup>WT</sup>, *art1*<sup>ΔPY</sup> or *art1*<sup>K486R</sup>. (F) Quantification of PM recruitment of Rsp5 in the  
779 experiment (E). (G) GFP-Rsp5 PM recruitment in the yeast cells expressing MUP1, *mup1*Δ or  
780 *mup1*-Q49R mutant. (H) Quantification of the Rsp5 PM recruitment in the experiment (G).

781

782 Figure S4. Deubiquitination of adaptor protein Art1 and Art5 by Ubp2. (A) Western blot analysis  
783 of Art1<sup>WT</sup> and *art1*<sup>K486R</sup> mutant in the indicated yeast strains: RSP5(WT), *rsp5*-Y516A and *rsp5*-  
784 F618A. (B) Western blot analysis of Art1-HTF with overexpression of yeast DUBs proteins  
785 individually. (C) Western blot analysis of Art1-HTF in the *ubp2*Δ mutant bearing an empty vector,  
786 or with overexpression of UBP2 or *ubp2*(C745V) mutant. (D) Western blot analysis of Art1-HTF  
787 in yeast strains: RSP5(WT), *rsp5*-F618A, *ubp2*Δ and *rsp5*-F618A/*ubp2*Δ. (E) Western blot of  
788 Art1-HTF in *ubp2*Δ and *rsp5*-F618A/*ubp2*Δ yeast strains bearing an empty vector, UBP2 or  
789 *ubp2*(C745V) mutant. (F) Western blot analysis of tetO7-Art5-HTF in WT and *ubp2*Δ mutant with  
790 mock treatment or inositol treatment (1hr). After inositol treatment, cells were washed and grown  
791 in fresh media for 3 hours. (G) Western blot analysis of tetO7-Art1-HTF in WT and *ubp2*Δ mutant  
792 with or without methionine treatment (1hr). The methionine treated cells were then washed and  
793 grown in fresh media for 3hours. (H) Cartoon model depicting the Art1 is ubiquitinated by E3  
794 ligase upon environmental cue then deubiquitinated by Ubp2. Non-ubiquitinated form of Art1 is  
795 ubiquitinated at K486 residue and engaged by Rsp5 for activation. This activated form of Art1 is  
796 then deubiquitinated by Ubp2 and Non-ubiquitinated form of Art1 is dis-engaged from Rsp5.

797 **References:**

- 798 Alvaro CG, O'Donnell AF, Prosser DC, Augustine AA, Goldman A, Brodsky JL, Cyert MS, Wendland  
799 B, Thorner J (2014) Specific alpha-arrestins negatively regulate *Saccharomyces cerevisiae*  
800 pheromone response by down-modulating the G-protein-coupled receptor Ste2. *Mol Cell Biol* 34:  
801 2660-2681
- 802 Aubry L, Klein G (2013) True arrestins and arrestin-fold proteins: a structure-based appraisal. *Prog*  
803 *Mol Biol Transl Sci* 118: 21-56
- 804 Baile MG, Guiney EL, Sanford EJ, MacGurn JA, Smolka MB, Emr SD (2019) Activity of a ubiquitin  
805 ligase adaptor is regulated by disordered insertions in its arrestin domain. *Mol Biol Cell* 30: 3057-  
806 3072
- 807 Becuwe M, Vieira N, Lara D, Gomes-Rezende J, Soares-Cunha C, Casal M, Haguenaer-Tsapis R,  
808 Vincent O, Paiva S, Leon S (2012) A molecular switch on an arrestin-like protein relays glucose  
809 signaling to transporter endocytosis. *J Cell Biol* 196: 247-259
- 810 Dikic I, Wakatsuki S, Walters KJ (2009) Ubiquitin-binding domains - from structures to functions.  
811 *Nat Rev Mol Cell Biol* 10: 659-671
- 812 Eddins MJ, Varadan R, Fushman D, Pickart CM, Wolberger C (2007) Crystal structure and solution  
813 NMR studies of Lys48-linked tetraubiquitin at neutral pH. *J Mol Biol* 367: 204-211
- 814 French ME, Kretzmann BR, Hicke L (2009) Regulation of the RSP5 ubiquitin ligase by an intrinsic  
815 ubiquitin-binding site. *J Biol Chem* 284: 12071-12079
- 816 Grenson M, Mousset M, Wiame JM, Bechet J (1966) Multiplicity of the amino acid permeases in  
817 *Saccharomyces cerevisiae*. I. Evidence for a specific arginine-transporting system. *Biochim*  
818 *Biophys Acta* 127: 325-338
- 819 Guiney EL, Klecker T, Emr SD (2016) Identification of the endocytic sorting signal recognized by  
820 the Art1-Rsp5 ubiquitin ligase complex. *Mol Biol Cell* 27: 4043-4054
- 821 Hatakeyama R, Kamiya M, Takahara T, Maeda T (2010) Endocytosis of the aspartic acid/glutamic  
822 acid transporter Dip5 is triggered by substrate-dependent recruitment of the Rsp5 ubiquitin  
823 ligase via the arrestin-like protein Aly2. *Mol Cell Biol* 30: 5598-5607
- 824 Hettema EH, Valdez-Taubas J, Pelham HR (2004) Bsd2 binds the ubiquitin ligase Rsp5 and  
825 mediates the ubiquitination of transmembrane proteins. *EMBO J* 23: 1279-1288
- 826 Ho HC, MacGurn JA, Emr SD (2017) Deubiquitinating enzymes Ubp2 and Ubp15 regulate  
827 endocytosis by limiting ubiquitination and degradation of ARTs. *Mol Biol Cell* 28: 1271-1283
- 828 Hofmann RM, Pickart CM (1999) Noncanonical MMS2-encoded ubiquitin-conjugating enzyme  
829 functions in assembly of novel polyubiquitin chains for DNA repair. *Cell* 96: 645-653
- 830 Hovsepian J, Albanese V, Becuwe M, Ivashov V, Teis D, Leon S (2018) The yeast arrestin-related  
831 protein Bul1 is a novel actor of glucose-induced endocytosis. *Mol Biol Cell* 29: 1012-1020
- 832 Hovsepian J, Defenouillere Q, Albanese V, Vachova L, Garcia C, Palkova Z, Leon S (2017) Multilevel  
833 regulation of an alpha-arrestin by glucose depletion controls hexose transporter endocytosis. *J*  
834 *Cell Biol* 216: 1811-1831
- 835 Ing B, Shteiman-Kotler A, Castelli M, Henry P, Pak Y, Stewart B, Boulianne GL, Rotin D (2007)  
836 Regulation of Commissureless by the ubiquitin ligase Dnedd4 is required for neuromuscular  
837 synaptogenesis in *Drosophila melanogaster*. *Mol Cell Biol* 27: 481-496
- 838 Kim HC, Huibregtse JM (2009) Polyubiquitination by HECT E3s and the determinants of chain type  
839 specificity. *Mol Cell Biol* 29: 3307-3318



840 Kim HC, Steffen AM, Oldham ML, Chen J, Huibregtse JM (2011) Structure and function of a HECT  
841 domain ubiquitin-binding site. *EMBO Rep* 12: 334-341

842 Komander D, Reyes-Turcu F, Licchesi JD, Odenwaelder P, Wilkinson KD, Barford D (2009)  
843 Molecular discrimination of structurally equivalent Lys 63-linked and linear polyubiquitin chains.  
844 *EMBO Rep* 10: 466-473

845 Konstas AA, Shearwin-Whyatt LM, Fotia AB, Degger B, Riccardi D, Cook DI, Korbmacher C, Kumar  
846 S (2002) Regulation of the epithelial sodium channel by N4WBP5A, a novel Nedd4/Nedd4-2-  
847 interacting protein. *J Biol Chem* 277: 29406-29416

848 Lauwers E, Jacob C, Andre B (2009) K63-linked ubiquitin chains as a specific signal for protein  
849 sorting into the multivesicular body pathway. *J Cell Biol* 185: 493-502

850 Leon S, Erpapazoglou Z, Haguenaer-Tsapis R (2008) Ear1p and Ssh4p are new adaptors of the  
851 ubiquitin ligase Rsp5p for cargo ubiquitylation and sorting at multivesicular bodies. *Mol Biol Cell*  
852 19: 2379-2388

853 Li M, Rong Y, Chuang YS, Peng D, Emr SD (2015) Ubiquitin-dependent lysosomal membrane  
854 protein sorting and degradation. *Mol Cell* 57: 467-478

855 Lin CH, MacGurn JA, Chu T, Stefan CJ, Emr SD (2008) Arrestin-related ubiquitin-ligase adaptors  
856 regulate endocytosis and protein turnover at the cell surface. *Cell* 135: 714-725

857 MacDonald C, Shields SB, Williams CA, Winistorfer S, Piper RC (2020) A Cycle of Ubiquitination  
858 Regulates Adaptor Function of the Nedd4-Family Ubiquitin Ligase Rsp5. *Curr Biol* 30: 465-479  
859 e465

860 MacDonald C, Stringer DK, Piper RC (2012) Sna3 is an Rsp5 adaptor protein that relies on  
861 ubiquitination for its MVB sorting. *Traffic* 13: 586-598

862 MacGurn JA, Hsu PC, Emr SD (2012) Ubiquitin and membrane protein turnover: from cradle to  
863 grave. *Annu Rev Biochem* 81: 231-259

864 MacGurn JA, Hsu PC, Smolka MB, Emr SD (2011) TORC1 regulates endocytosis via Npr1-mediated  
865 phosphoinhibition of a ubiquitin ligase adaptor. *Cell* 147: 1104-1117

866 Maspero E, Mari S, Valentini E, Musacchio A, Fish A, Pasqualato S, Polo S (2011) Structure of the  
867 HECT:ubiquitin complex and its role in ubiquitin chain elongation. *EMBO Rep* 12: 342-349

868 Myat A, Henry P, McCabe V, Flintoft L, Rotin D, Tear G (2002) Drosophila Nedd4, a ubiquitin ligase,  
869 is recruited by Commissureless to control cell surface levels of the roundabout receptor. *Neuron*  
870 35: 447-459

871 Nikko E, Pelham HR (2009) Arrestin-mediated endocytosis of yeast plasma membrane  
872 transporters. *Traffic* 10: 1856-1867

873 O'Donnell AF, Huang L, Thorner J, Cyert MS (2013) A calcineurin-dependent switch controls the  
874 trafficking function of alpha-arrestin Aly1/Art6. *J Biol Chem* 288: 24063-24080

875 Ohtake F, Tsuchiya H, Saeki Y, Tanaka K (2018) K63 ubiquitylation triggers proteasomal  
876 degradation by seeding branched ubiquitin chains. *Proc Natl Acad Sci U S A* 115: E1401-E1408

877 Rotin D, Kumar S (2009) Physiological functions of the HECT family of ubiquitin ligases. *Nat Rev*  
878 *Mol Cell Biol* 10: 398-409

879 Saeki Y, Kudo T, Sone T, Kikuchi Y, Yokosawa H, Toh-e A, Tanaka K (2009) Lysine 63-linked  
880 polyubiquitin chain may serve as a targeting signal for the 26S proteasome. *EMBO J* 28: 359-371

881 Sardana R, Zhu L, Emr SD (2018) Rsp5 Ubiquitin ligase-mediated quality control system clears  
882 membrane proteins mistargeted to the vacuole membrane. *J Cell Biol*

883 Sato Y, Yoshikawa A, Yamagata A, Mimura H, Yamashita M, Ookata K, Nureki O, Iwai K, Komada  
884 M, Fukai S (2008) Structural basis for specific cleavage of Lys 63-linked polyubiquitin chains.  
885 *Nature* 455: 358-362

886 Sato Y, Yoshikawa A, Yamashita M, Yamagata A, Fukai S (2009) Structural basis for specific  
887 recognition of Lys 63-linked polyubiquitin chains by NZF domains of TAB2 and TAB3. *EMBO J* 28:  
888 3903-3909

889 Schild L, Lu Y, Gautschi I, Schneeberger E, Lifton RP, Rossier BC (1996) Identification of a PY motif  
890 in the epithelial Na channel subunits as a target sequence for mutations causing channel  
891 activation found in Liddle syndrome. *EMBO J* 15: 2381-2387

892 Shih SC, Sloper-Mould KE, Hicke L (2000) Monoubiquitin carries a novel internalization signal that  
893 is appended to activated receptors. *EMBO J* 19: 187-198

894 Sims JJ, Cohen RE (2009) Linkage-specific avidity defines the lysine 63-linked polyubiquitin-  
895 binding preference of rap80. *Mol Cell* 33: 775-783

896 Sloper-Mould KE, Jemc JC, Pickart CM, Hicke L (2001) Distinct functional surface regions on  
897 ubiquitin. *J Biol Chem* 276: 30483-30489

898 Spence J, Sadis S, Haas AL, Finley D (1995) A ubiquitin mutant with specific defects in DNA repair  
899 and multiubiquitination. *Mol Cell Biol* 15: 1265-1273

900 Swaney DL, Beltrao P, Starita L, Guo A, Rush J, Fields S, Krogan NJ, Villen J (2013) Global analysis  
901 of phosphorylation and ubiquitylation cross-talk in protein degradation. *Nat Methods* 10: 676-  
902 682

903 Tsui C, Raguraj A, Pickart CM (2005) Ubiquitin binding site of the ubiquitin E2 variant (UEV)  
904 protein Mms2 is required for DNA damage tolerance in the yeast RAD6 pathway. *J Biol Chem* 280:  
905 19829-19835

906 Yashiroda H, Oguchi T, Yasuda Y, Toh EA, Kikuchi Y (1996) Bul1, a new protein that binds to the  
907 Rsp5 ubiquitin ligase in *Saccharomyces cerevisiae*. *Mol Cell Biol* 16: 3255-3263

908 Zhu L, Jorgensen JR, Li M, Chuang YS, Emr SD (2017) ESCRTs function directly on the lysosome  
909 membrane to downregulate ubiquitinated lysosomal membrane proteins. *Elife* 6

910 Zhu L, Sardana R, Jin DK, Emr SD (2020) Calcineurin-dependent regulation of endocytosis by a  
911 plasma membrane ubiquitin ligase adaptor, Rcr1. *J Cell Biol* 219  
912

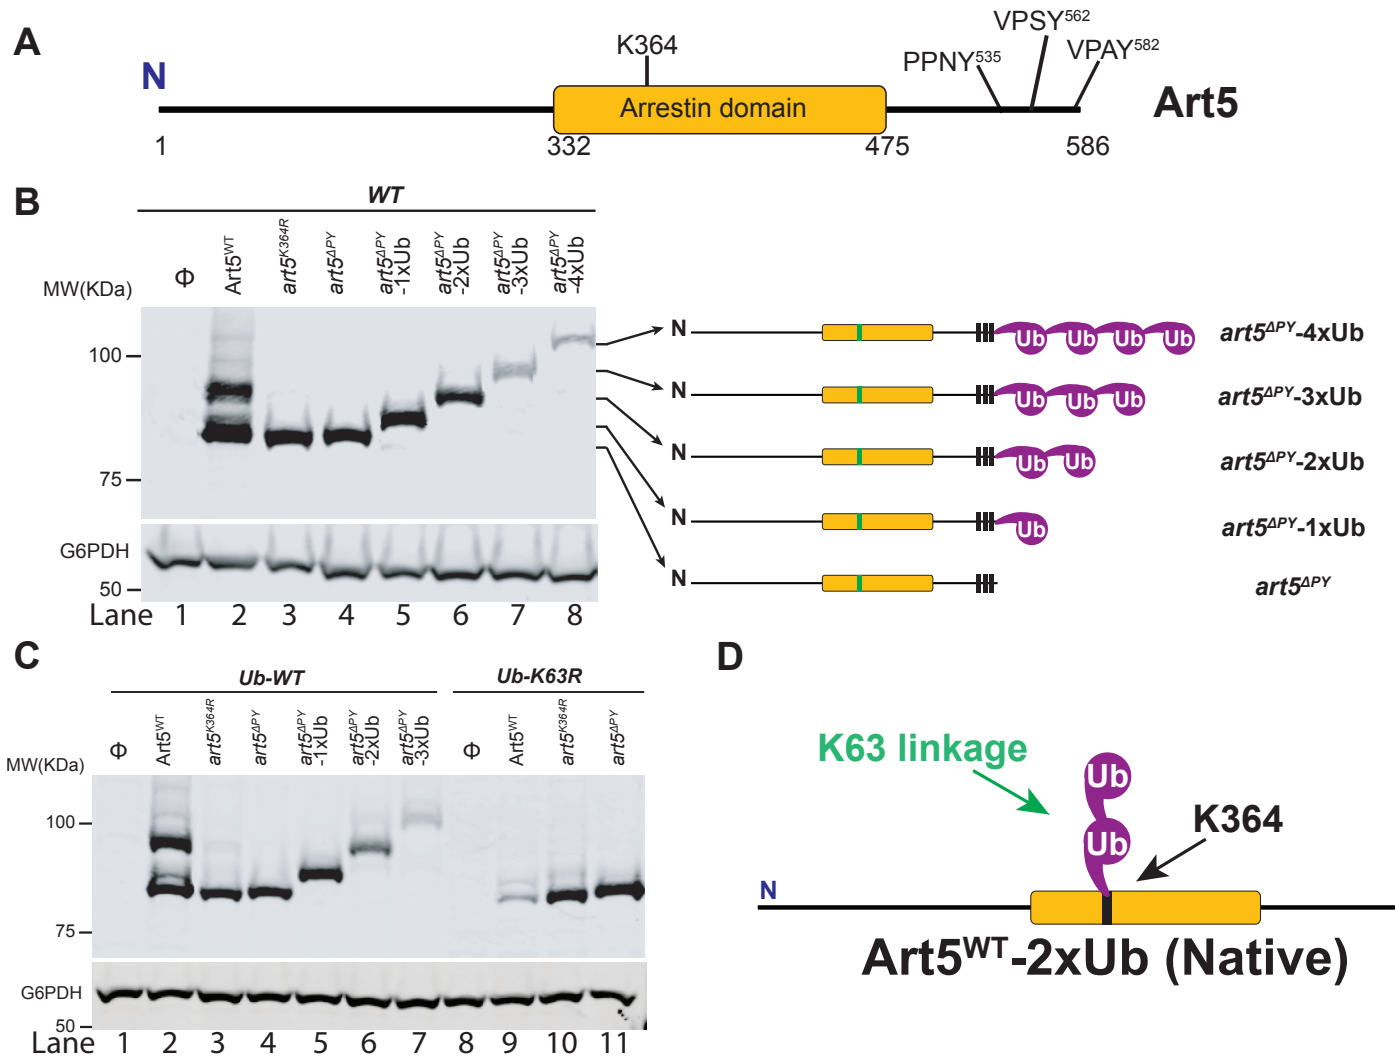

**Figure 1**

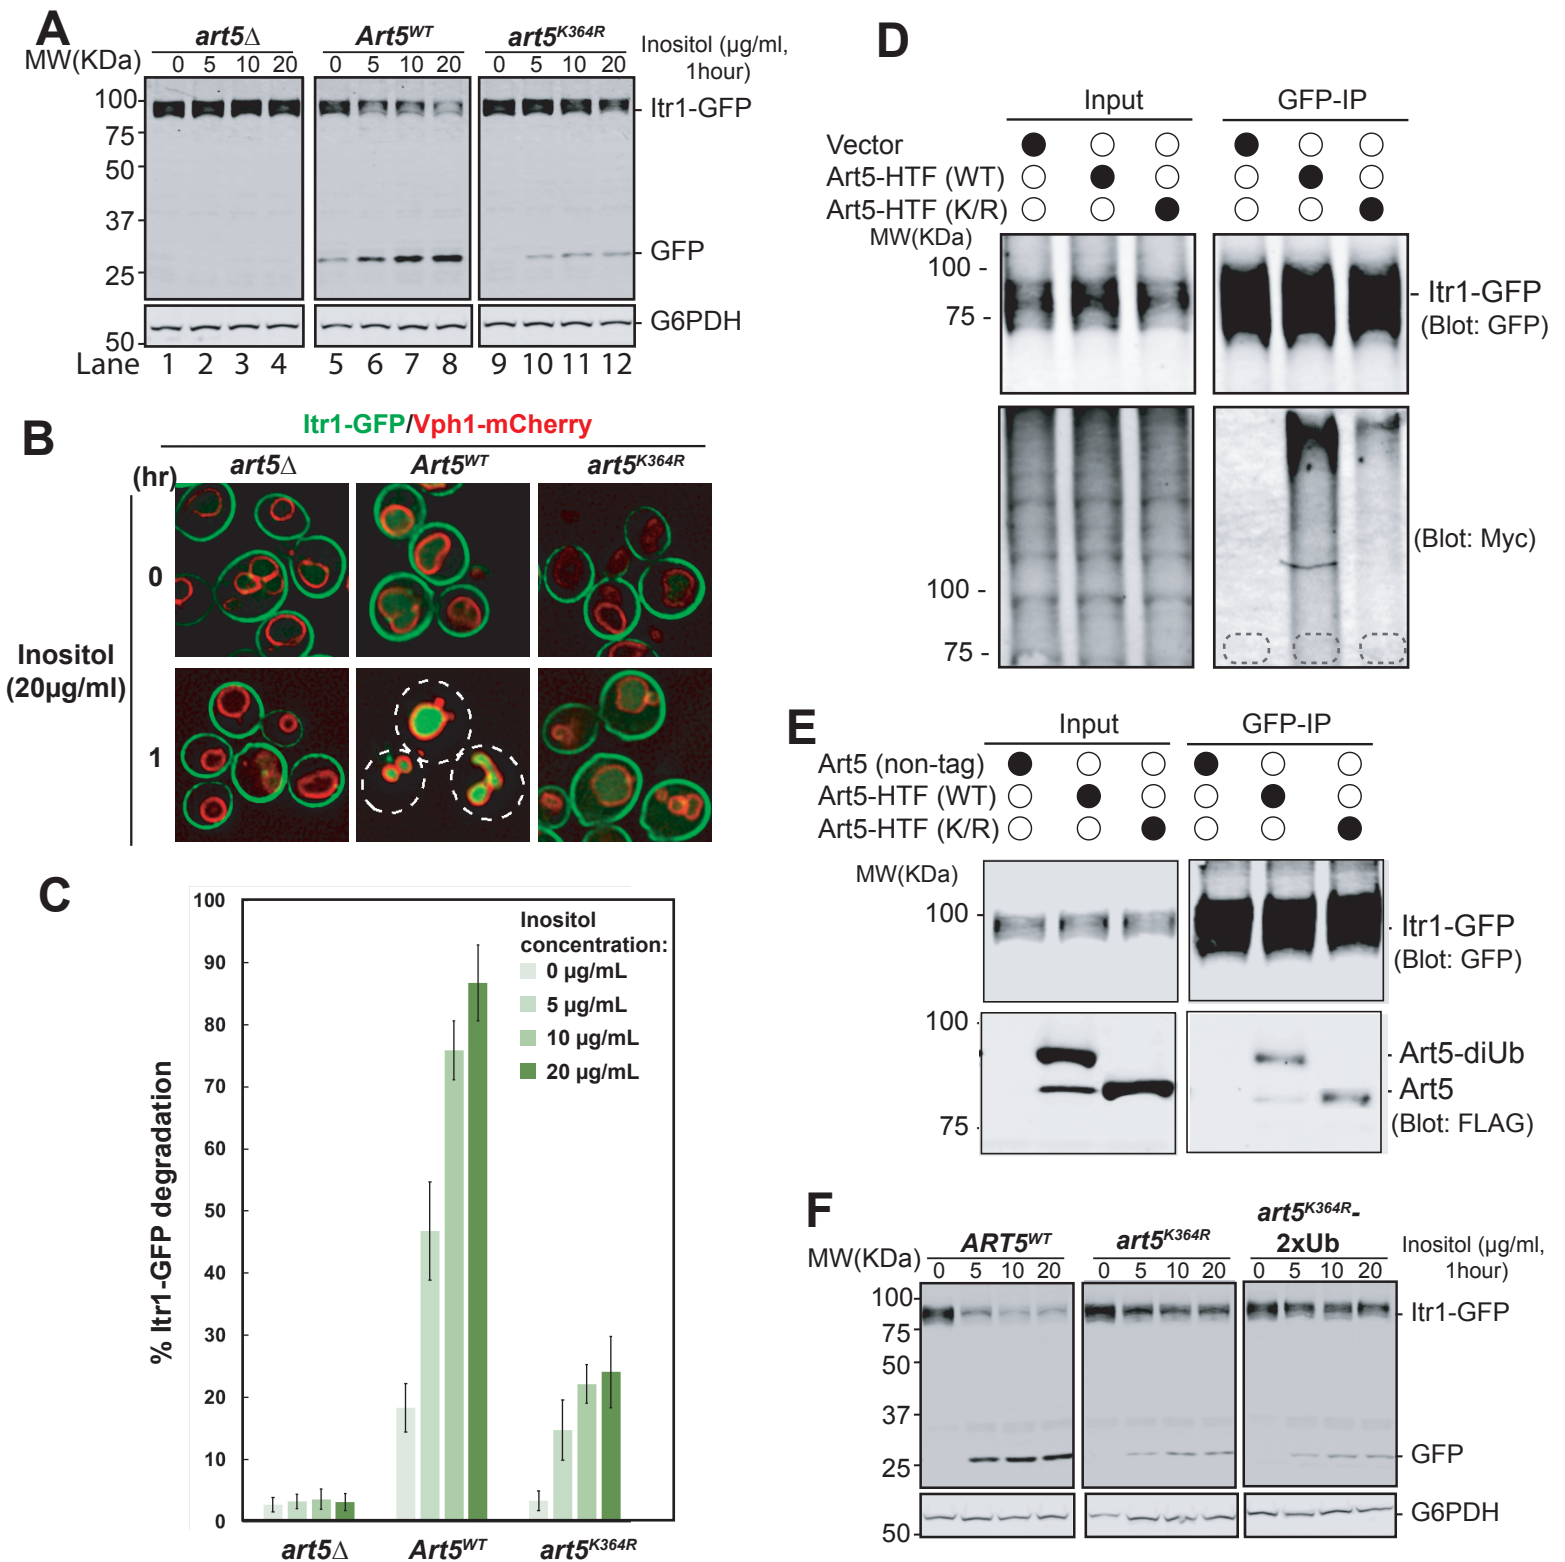

**Figure 2**

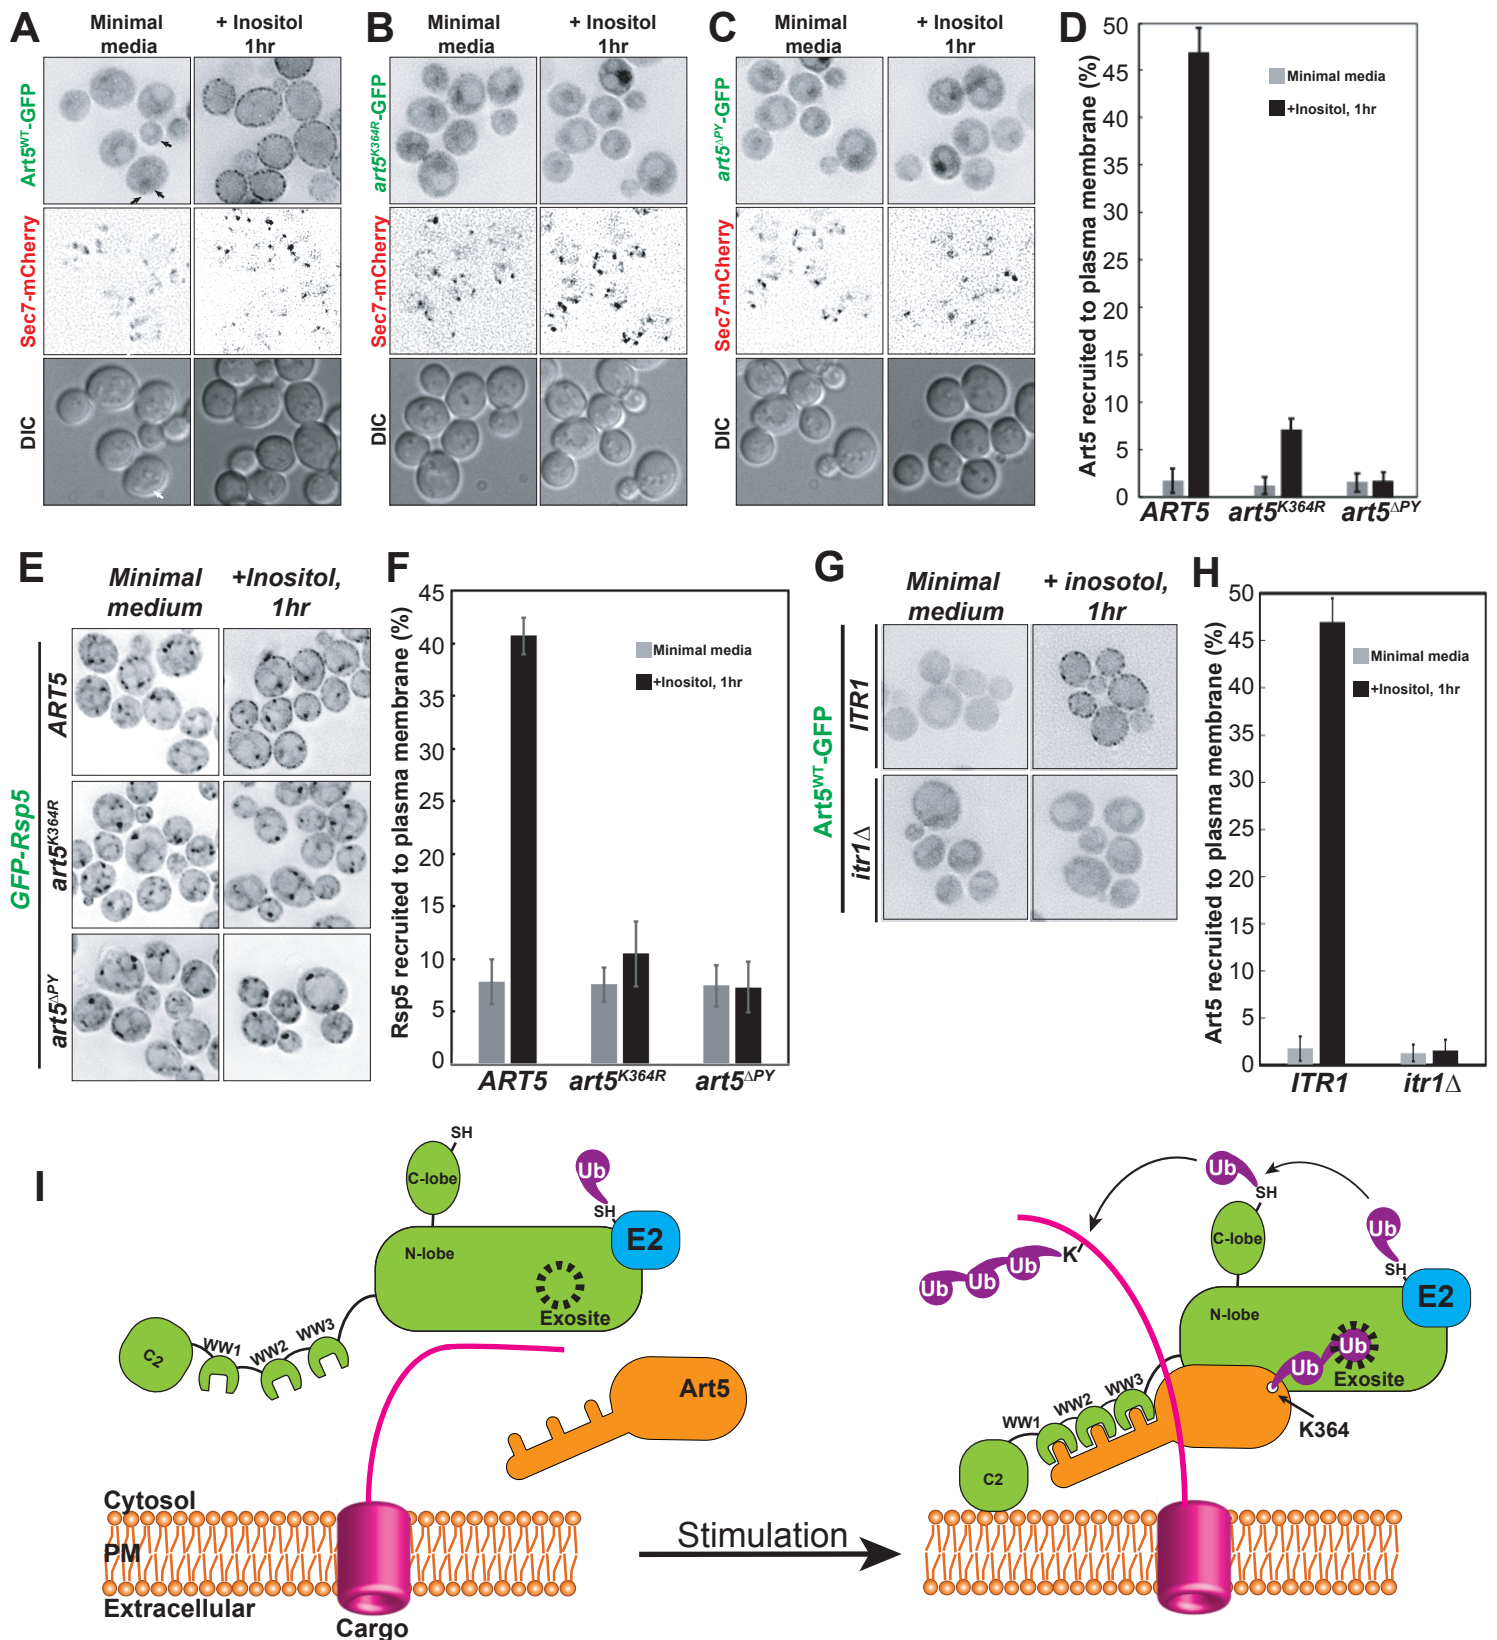

Figure 3

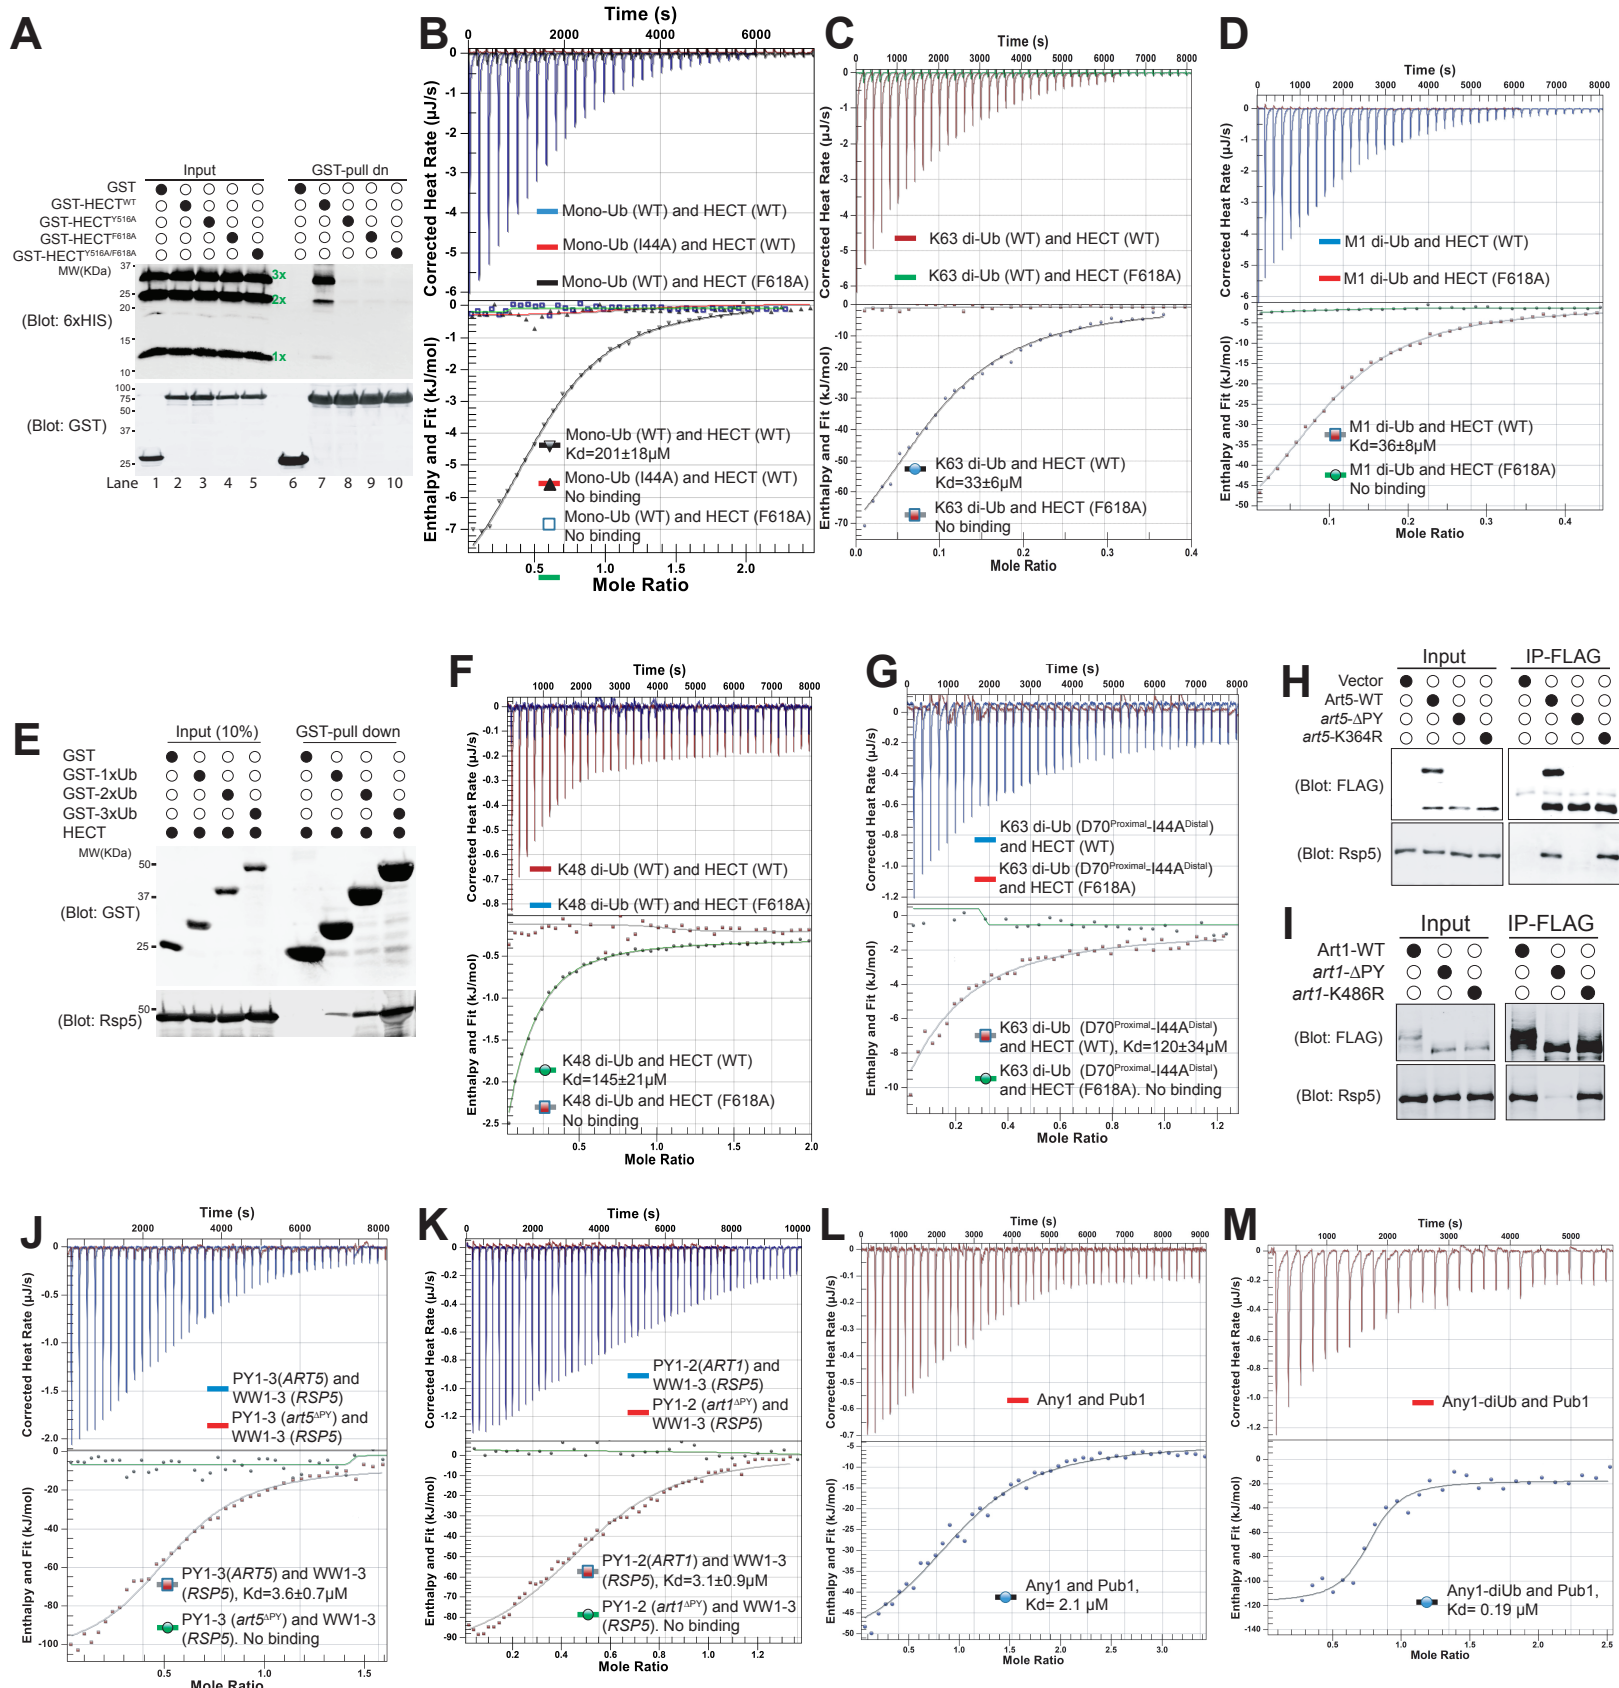

**Figure 4**

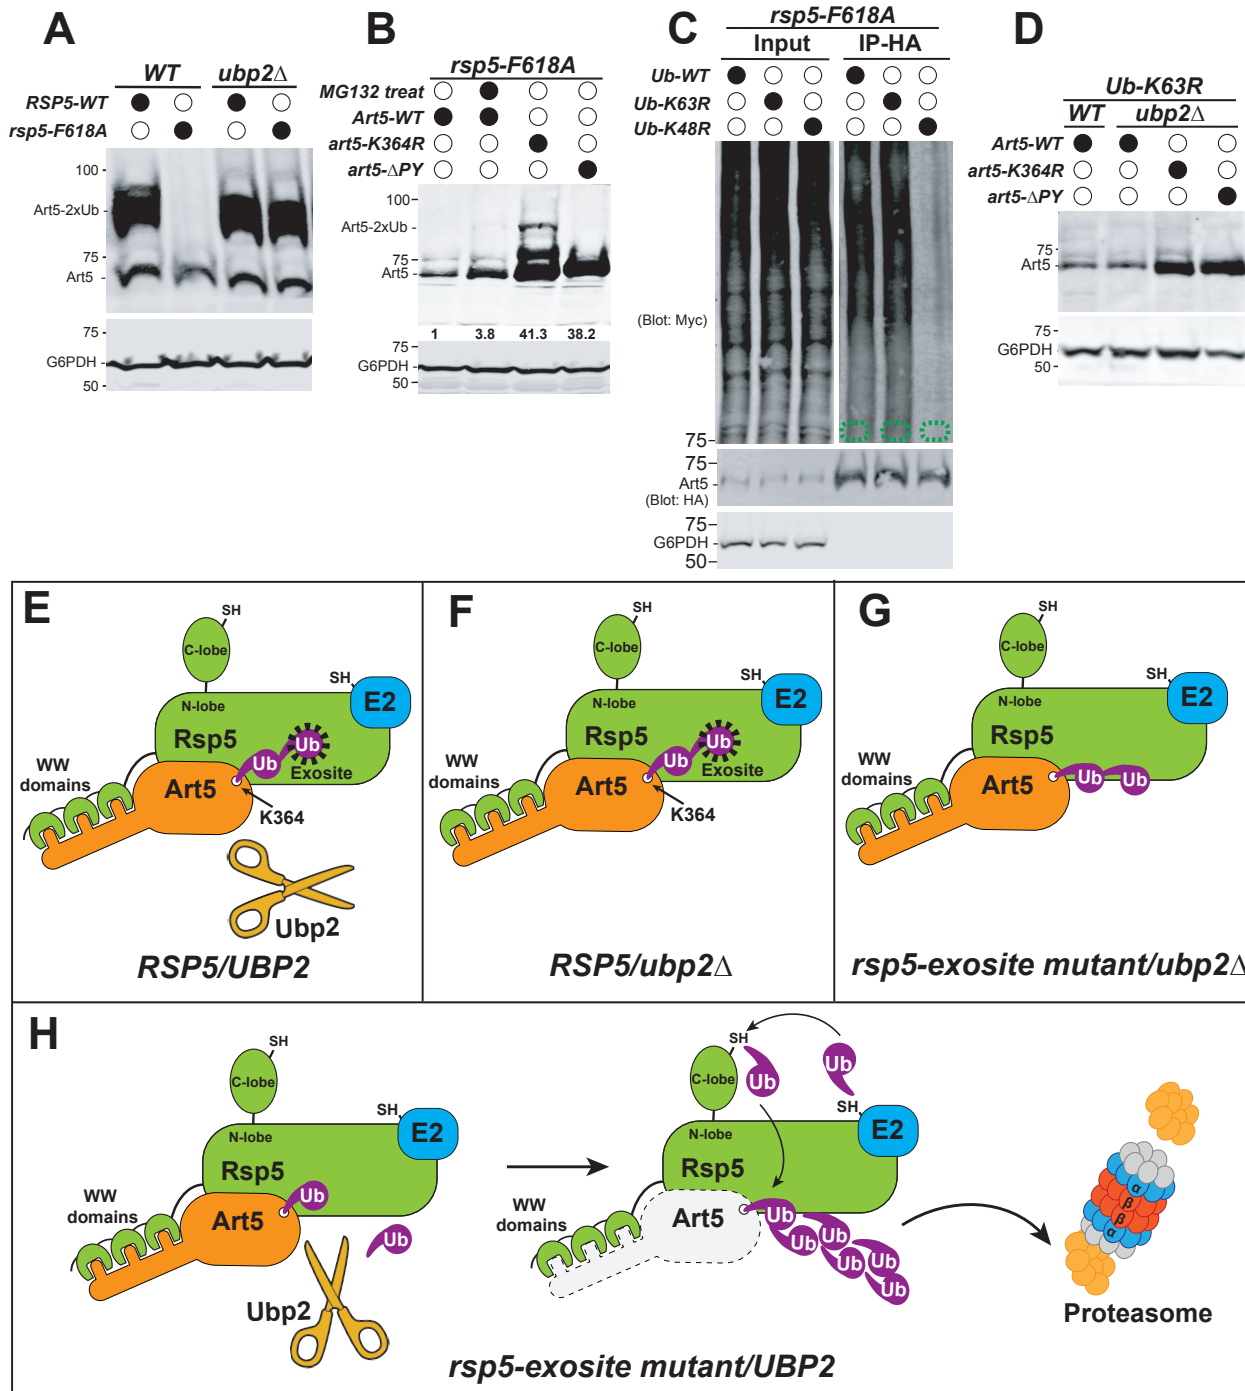

Figure 5
